# Supplementary material for: Unveiling the double triplet nature of the 2Ag state in conjugated stilbenoid compounds to achieve efficient singlet fission
Source: Royal Society of Chemistry journal article supplement (doi:10.1039/d3cp02805d), 2023-01-01
Supplement: d3cp02805d1.pdf [file d3cp02805d1.pdf]

# Unveiling the Double Triplet Nature of the 2Ag State in Conjugated Stilbenoid Compounds to Achieve Efficient Singlet Fission

Letizia Mencaroni,<sup>a</sup> Martina Alebardi,<sup>a</sup> Fausto Elisei,<sup>a</sup> Irena Škorić,<sup>b</sup> Anna Spalletti,<sup>a</sup> Benedetta Carlotti\*,<sup>a</sup>

<sup>a</sup> Department of Chemistry, Biology and Biotechnology, University of Perugia, via elce di sotto 8, 06123 Perugia, Italy.

<sup>b</sup> Department of Organic Chemistry, Faculty of Chemical Engineering and Technology, University of Zagreb, 10000 Zagreb, Croatia.

## ELECTRONIC SUPPORTING INFORMATION

### Table of contents

1. Experimental section
2. Spectral and fluorescence properties
3. Triplet properties
4. Ultrafast spectroscopy
5. Phosphorescence measurements
6. Quantum mechanical calculations

#### 1. Experimental section

##### Materials and methods

**Chemicals.** The investigated compounds were synthesized according to the procedures described in previous papers.<sup>1–4</sup> Spectral and photophysical properties were recorded in many solvents with spectroscopic grade: Perfluorohexane (PFHx, Sigma-Aldrich), 2-Methylbutane (IP, Sigma-Aldrich), Hexane (Hx, Sigma-Aldrich), 3-Methylpentane (3-MP, Sigma-Aldrich), methylcyclohexane (MeCH, Sigma-Aldrich), Decahydronaphtalene (DHN, Sigma-Aldrich), Toluene (Tol, Sigma-Aldrich), Anisole (An, Sigma-Aldrich), Dimethylsulfoxide (DMSO, Carlo Erba), Bromonaphtalene (BrN, Sigma-Aldrich) and Diiodomethane (DIM, Sigma-Aldrich).

**Photophysical characterization.** Stationary absorption measurements were carried out by a Varian Cary 1 UV-Visible spectrophotometer. A FluoroMax-4P spectrofluorimeter by HORIBA scientific operated by FluorEssence and a FS5 Spectrofluorimeter by Edinburgh Instruments operated by Fluoracle software were used instead for excitation and emission fluorescence spectra at room temperature. Air-equilibrated dilute solutions (absorbance < 0.1 at the excitation wavelength) were used for the fluorimetric measurements. The fluorescence quantum yields ( $\Phi_F$ , experimental error  $\pm 10\%$  and  $20\%$  when  $\Phi_F \leq 10^{-4}$ ) were obtained by employing tetracene ( $\Phi_F = 0.17$  in air-equilibrated cyclohexane) and 9,10-diphenylanthracene ( $\Phi_F = 0.73$  in air-equilibrated cyclohexane) as reference compounds,<sup>5</sup> taking also into account the different refractive indexes of the used solvents.

Triplet properties were measured by laser flash photolysis (Edinburgh LP980) at 355 nm (third harmonic of a Continuum Surelite II Nd:YAG laser, Spectra Physics) with nanosecond time-resolution (pulse width 7 ns and laser energy < 1 mJ per pulse) coupled with a PMT for signal detection. The excitation at 355 nm was the pump-pulse while a pulsed xenon lamp was used to probe the absorption properties of the produced excited states. The experimental setup was calibrated by an optical matched solution of benzophenone (Bz) in MeCN ( $\Phi_T = 1$  and  $\epsilon_T = 6500 \text{ M}^{-1} \text{ cm}^{-1}$  at 520 nm).<sup>6</sup> Triplet–triplet absorption coefficients ( $\epsilon_T$ ) were retrieved from previous investigations.<sup>4,7,8</sup> The triplet quantum yields,  $\Phi_T$ , were determined (estimated uncertainty of  $\pm 15\%$ ) by an

actinometry approach considering Bz or thioxanten-9-one (TX) in AcCN ( $\Phi_T = 0.66^9$  and  $\epsilon_T = 30000 \text{ M}^{-1} \text{ cm}^{-1}$  at  $\lambda_T = 630 \text{ nm}$ )<sup>10</sup> and anthracene (A) in CH ( $\Phi_T = 0.71$  and  $\epsilon_T = 45500 \text{ M}^{-1} \text{ cm}^{-1}$  at  $\lambda_T = 422 \text{ nm}$ )<sup>6</sup> as references. All measurements were performed by purging the sample with pure molecular nitrogen. The study of the concentration effect on  $\Phi_T$  was intrinsically limited by the experimental technique itself. Therefore, a narrow range of concentrations (corresponding to absorbances:  $A_{355} \approx 0.1, 0.5$  up to  $A_{355} = 1$ ) could be analyzed. The detailed methodologies concerning the determination of the triplet extinction coefficient and the quantum yield, jointly to its concentration dependence, have been extensively discussed in the Supporting Information of Ref <sup>11</sup>.

The experimental setup for ultrafast transient absorption experiments have been previously reported.<sup>12–15</sup> The 400 nm excitation pulses (*ca.* 60 fs) were generated by an amplified Ti:Sapphire laser system (Spectra Physics). The Helios transient absorption spectrometer (Ultrafast Systems) is characterized by a temporal resolution of about 150 fs and a spectral resolution of 1.5 nm. A small portion of the 800-nm light passes through an optical delay line (time window of 3200 ps) and is focused onto a Sapphire crystal (2 mm thick) to generate a white-light in the 450–800 nm spectral range (probe pulse). All measurements were carried out under the magic angle in 2 mm cell at an absorbance of about 0.5 at 400 nm (concentration  $\approx 2 \times 10^{-4} \text{ M}$ ). The solution was stirred during the experiments to avoid photoproduct interferences. Photodegradation was checked recording the absorption spectra before and after the time-resolved measurements, where no significant change was observed. The experimental 3D data matrices were firstly analyzed performing the Global Analysis by Surface Xplorer PRO (Ultrafast Systems) software, and successively through GloTarAn software in order to obtain the Evolution-Associated Spectra (EAS) considering a consecutive kinetic model. The statistical uncertainties on the transient lifetimes provided by the fitting were found to be *ca.* 10%.

**Quantum mechanical calculations.** Quantum mechanical calculations were performed by using the Gaussian 16 package.<sup>16</sup> DFT with the CAM–B3LYP functional was chosen as the method to optimize the ground state geometry of these small organic push-pull systems and to derive their properties.<sup>17</sup> In contrast the lowest singlet excited states were investigated using TD–DFT excited-state calculations with the CAM–B3LYP functional. Every calculation was submitted using 6–31+G(d,p) as the basis set including the solvent effect (CH) according to the conductor-like polarizable continuum model (CPCM).<sup>18</sup>

## 2. Spectral and fluorescence properties

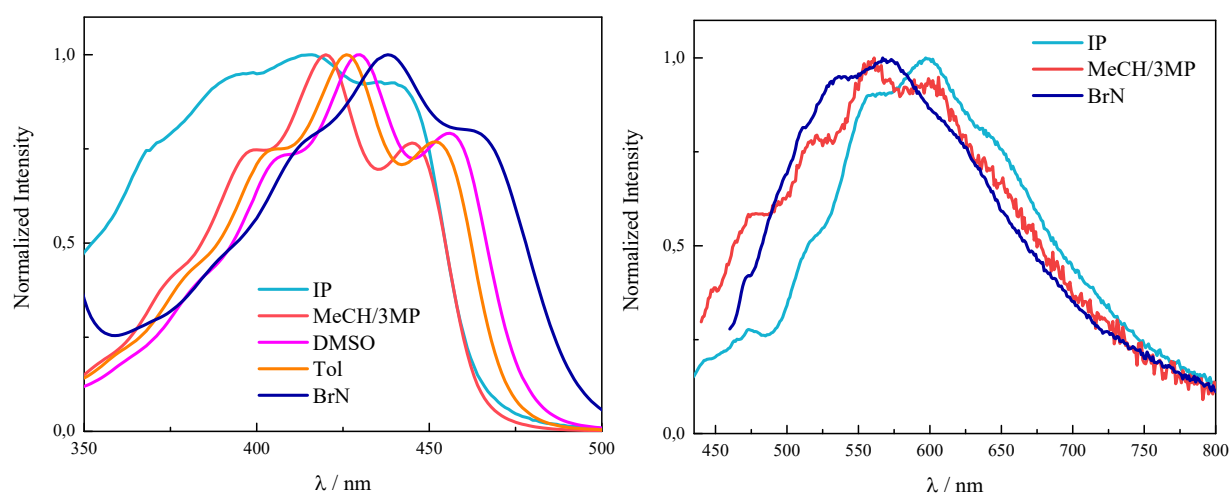

**Figure ESI.1.** Normalized absorption (left) and emission (right) spectra of **2,5-(PhBu)<sub>2</sub>T** in solvents of different polarizability.

**Table ESI.1.** Spectral and fluorescence properties of **2,5-(PhBu)<sub>2</sub>T** in solvents of different polarizability. The main absorption/emission maximum is in bold; sh means shoulder.

| <b>2,5-(PhBu)<sub>2</sub>T</b> | n       | ε      | λ <sub>abs</sub> / nm                         | λ <sub>em</sub> / nm                                                             |
|--------------------------------|---------|--------|-----------------------------------------------|----------------------------------------------------------------------------------|
| IP                             | 1.3540  | 1.8275 | 369 <sup>sh</sup><br>392<br><b>415</b><br>440 | 474 <sup>sh</sup><br>514 <sup>sh</sup><br>557<br><b>598</b><br>647 <sup>sh</sup> |
| MeCH-3MP (9/1)                 | 1.3812  | 2.0075 | 373 <sup>sh</sup><br>398<br><b>420</b><br>445 | 474 <sup>sh</sup><br>516<br><b>561</b><br>598<br>649 <sup>sh</sup>               |
| DMSO                           | 1.4793  | 46.68  | 381 <sup>sh</sup><br>406<br><b>430</b><br>456 |                                                                                  |
| Tol                            | 1.49693 | 2.379  | 379 <sup>sh</sup><br>404<br><b>426</b><br>451 |                                                                                  |
| BrN                            | 1.6570  | 4.768  | 387 <sup>sh</sup><br>413<br><b>438</b><br>465 | 472 <sup>sh</sup><br>510 <sup>sh</sup><br>534<br><b>567</b><br>619 <sup>sh</sup> |

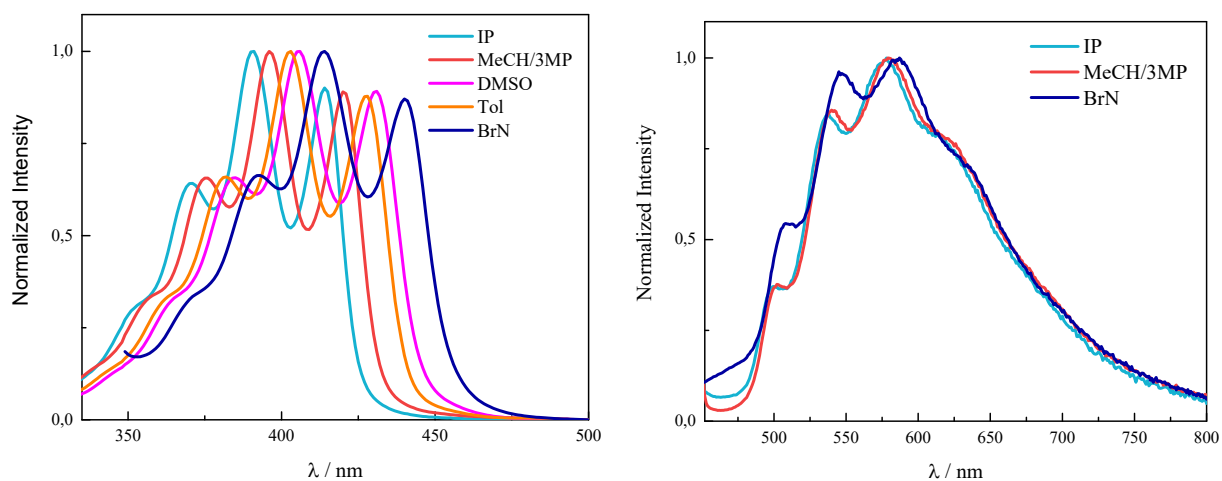

**Figure ESI.2.** Normalized absorption (left) and emission (right) spectra of **D2TO** in solvents of different polarizability.

**Table ESI.2.** Spectral and fluorescence properties of **D2TO** in solvents of different polarizability. The main absorption/emission maximum is in bold; sh means shoulder.

| <b>D2TO</b>    | n       | $\epsilon$ | $\lambda_{\text{abs}} / \text{nm}$ | $\lambda_{\text{em}} / \text{nm}$ |
|----------------|---------|------------|------------------------------------|-----------------------------------|
| IP             | 1.3540  | 1.8275     | 350 <sup>sh</sup>                  | 498 <sup>sh</sup>                 |
|                |         |            | 370                                | 536                               |
|                |         |            | <b>391</b>                         | <b>577</b>                        |
|                |         |            | 414                                | 623 <sup>sh</sup>                 |
| MeCH-3MP (9/1) | 1.3812  | 2.0075     | 356 <sup>sh</sup>                  | 502 <sup>sh</sup>                 |
|                |         |            | 376                                | 541                               |
|                |         |            | <b>396</b>                         | <b>579</b>                        |
|                |         |            | 420                                | 625 <sup>sh</sup>                 |
| DMSO           | 1.4793  | 46.68      | 363 <sup>sh</sup>                  |                                   |
|                |         |            | 385                                |                                   |
|                |         |            | <b>405</b>                         |                                   |
|                |         |            | 431                                |                                   |
| Tol            | 1.49693 | 2.379      | 361 <sup>sh</sup>                  |                                   |
|                |         |            | 382                                |                                   |
|                |         |            | <b>403</b>                         |                                   |
|                |         |            | 427                                |                                   |
| BrN            | 1.6570  | 4.768      | 370 <sup>sh</sup>                  | 508 <sup>sh</sup>                 |
|                |         |            | 392                                | 548                               |
|                |         |            | <b>414</b>                         | <b>587</b>                        |
|                |         |            | 440                                | 635 <sup>sh</sup>                 |
|                |         |            |                                    |                                   |

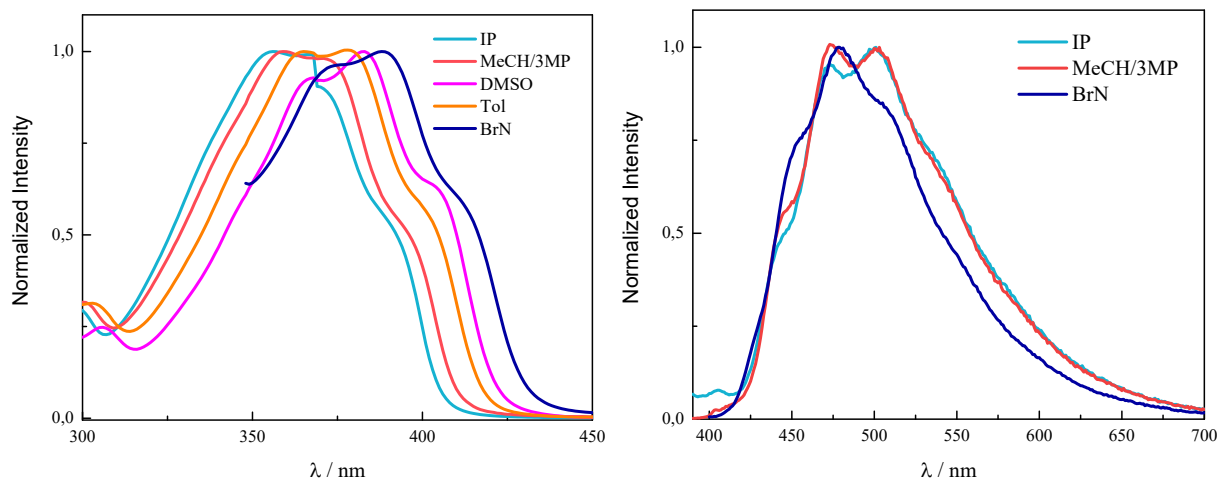

**Figure ESI.3.** Normalized absorption (left) and emission (right) spectra of **1NPH** in solvents of different polarizability.

**Table ESI.3.** Spectral and fluorescence properties of **1NPH** in solvents of different polarizability. The main absorption/emission maximum is in bold; sh means shoulder.

| <b>1NPH</b>    | n       | $\epsilon$ | $\lambda_{\text{abs}} / \text{nm}$     | $\lambda_{\text{em}} / \text{nm}$                                         |
|----------------|---------|------------|----------------------------------------|---------------------------------------------------------------------------|
| IP             | 1.3540  | 1.8275     | <b>356</b><br>371<br>392 <sup>sh</sup> | 444 <sup>sh</sup><br>473<br><b>501</b><br>539 <sup>sh</sup>               |
| MeCH-3MP (9/1) | 1.3812  | 2.0075     | <b>359</b><br>371<br>396 <sup>sh</sup> | 445 <sup>sh</sup><br><b>472</b><br>501<br>538 <sup>sh</sup>               |
| DMSO           | 1.4793  | 46.68      | <b>367</b><br>383<br>404 <sup>sh</sup> |                                                                           |
| Tol            | 1.49693 | 2.379      | <b>366</b><br>378<br>401 <sup>sh</sup> |                                                                           |
| BrN            | 1.6570  | 4.768      | 373<br><b>388</b><br>413 <sup>sh</sup> | 450 <sup>sh</sup><br><b>480</b><br>508 <sup>sh</sup><br>550 <sup>sh</sup> |

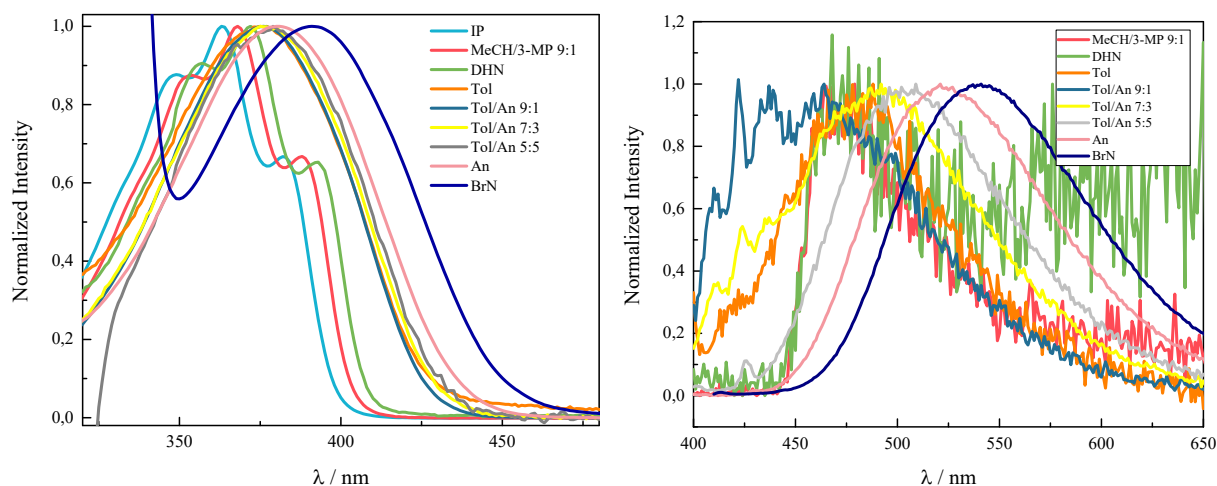

**Figure ESI.4.** Normalized absorption (left) and emission (right) spectra of **DF** in solvents of different polarizability.

**Table ESI.4.** Spectral and fluorescence properties of **DF** in solvents of different polarizability. The main absorption/emission maximum is in bold.

| DF             | n       | $\epsilon$ | $\lambda_{\text{abs}} / \text{nm}$ | $\lambda_{\text{em}} / \text{nm}$ |
|----------------|---------|------------|------------------------------------|-----------------------------------|
| IP             | 1.3540  | 1.8275     | 349                                |                                   |
|                |         |            | <b>363</b>                         |                                   |
|                |         |            | 383                                |                                   |
| MeCH-3MP (9/1) | 1.3812  | 2.008      | 353                                | 479                               |
|                |         |            | <b>368</b>                         |                                   |
| DHN            | 1.4758  | 2.154      | 357                                | 468                               |
|                |         |            | <b>372</b>                         |                                   |
| Tol            | 1.49693 | 2.379      | 375                                | 488                               |
|                |         |            | <b>393</b>                         |                                   |
| Tol/An 9:1     | 1.4989  | 2.574      | 376                                | 464                               |
| Tol/An 7:3     | 1.5031  | 2.964      | 377                                | 492                               |
| Tol/An 5:5     | 1.5073  | 3.355      | 379                                | 509                               |
| An             | 1.5179  | 4.330      | 382                                | 521                               |
| BrN            | 1.6570  | 4.768      | 390                                | 541                               |

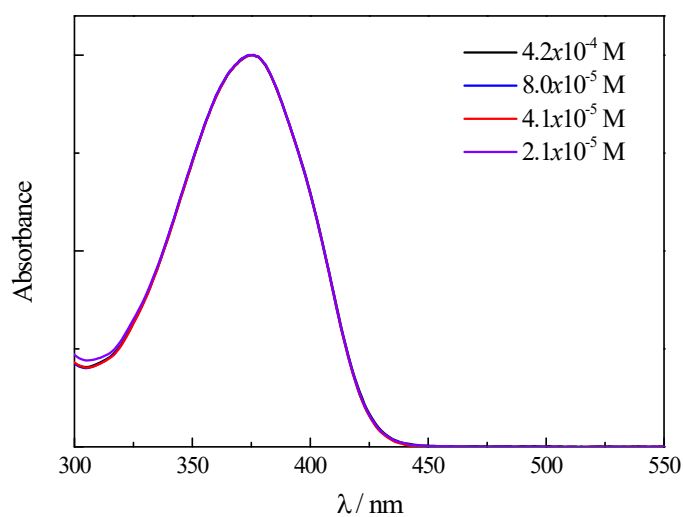

**Figure ESI.5.** Absorption spectra of compound **DF** in Tol as a function of concentration.

**Table ESI.5.** Fluorescence properties of **2,5-(PhBu)<sub>2</sub>T** and **D2TO** in solvents of different polarizability.

| Sample                         | Solvent       | n       | $\Phi_F$            | $\tau_F$ / ns      | $k_F$ / s <sup>-1</sup> |
|--------------------------------|---------------|---------|---------------------|--------------------|-------------------------|
| <b>2,5-(PhBu)<sub>2</sub>T</b> | IP            | 1.3540  | 0.0006              | 0.305              | $2.0 \times 10^6$       |
|                                | MeCH/3-MP 9:1 | 1.3812  | 0.0012 <sup>a</sup> | 0.290 <sup>a</sup> | $4.1 \times 10^6$       |
|                                | DMSO          | 1.4793  | 0.0021              | 0.510              | $4.1 \times 10^6$       |
|                                | Tol           | 1.49693 | 0.0028              | 0.295 <sup>b</sup> | $9.5 \times 10^6$       |
|                                | BrN           | 1.6570  | 0.0046              | 0.650              | $7.1 \times 10^6$       |
| <b>D2TO</b>                    | MeCH/3-MP 9:1 | 1.3812  | 0.003               | 0.958              | $3.1 \times 10^6$       |
|                                | Tol           | 1.49693 | 0.007               | 1.07               | $6.5 \times 10^6$       |

<sup>a</sup>From ref. 2

<sup>b</sup>From Femtosecond Transient Absorption measurements

### 3. Triplet properties

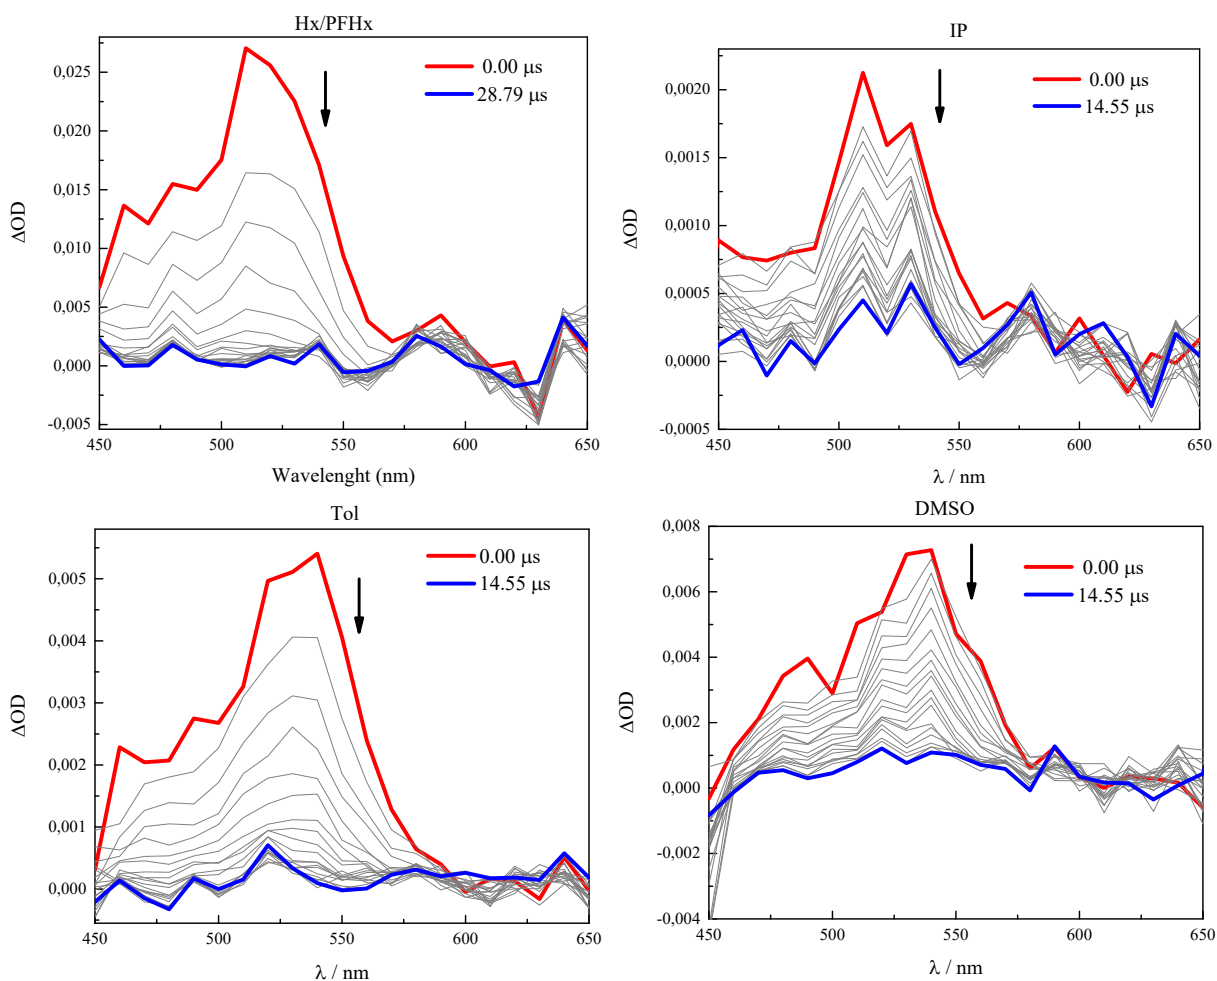

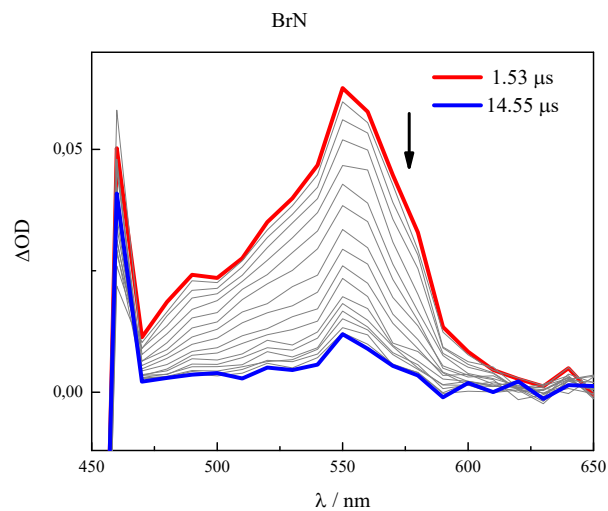

**Figure ESI.6.** Triplet transient absorption spectra obtained in  $\text{N}_2$ -purged solutions of **2,5-(2TE)<sub>2</sub>T** in solvents of different polarizability.

**Table ESI.6.** Triplet properties of **2,5-(2TE)<sub>2</sub>T** in solvents of different polarizability.

| Solvent | $\Phi_T (\text{N}_2)$ | $\lambda_T / \text{nm}$ | $\tau_T (\text{air}) / \mu\text{s}$ | $\tau_T (\text{N}_2) / \mu\text{s}$ | $k_T / 10^7 \text{ s}^{-1}$ |
|---------|-----------------------|-------------------------|-------------------------------------|-------------------------------------|-----------------------------|
| Hx/PFHx | 0.09                  | 520                     | 0.074                               | 5.60                                | 4.3                         |
| IP      | 0.09                  | 510                     | 0.478                               | 7.03                                | 5.0                         |
| DMSO    | 0.18                  | 545                     | 0.590                               | 8.10                                | 9.5                         |
| Tol     | 0.14                  | 540                     | 0.019                               | 6.29                                | 7.8                         |
| BrN     | 0.19                  | 550                     | 0.890                               | 7.03                                | 12.7                        |



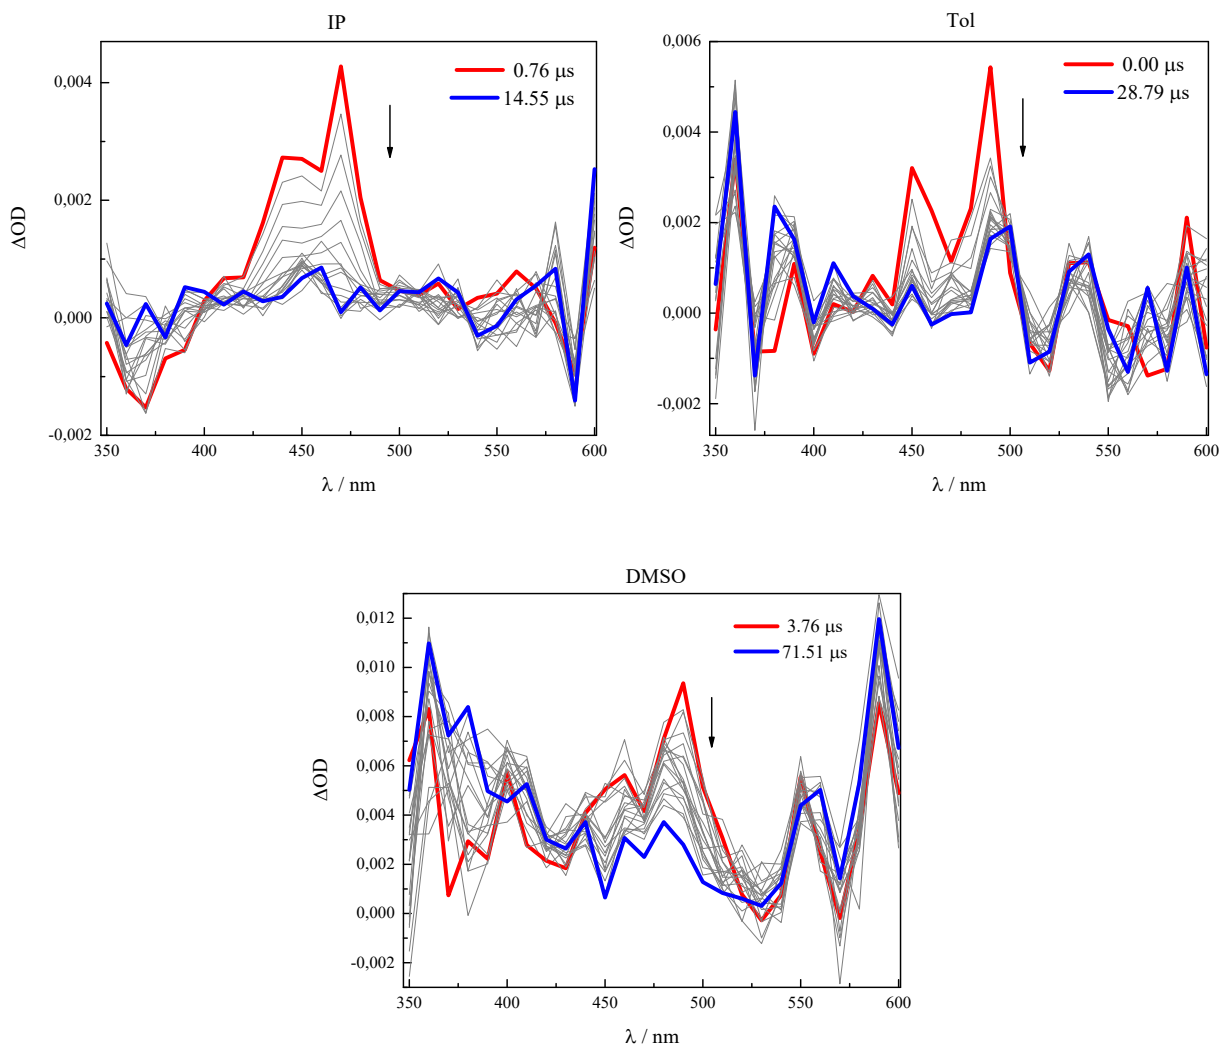

**Figure ESI.7.** Triplet transient absorption spectra obtained in  $N_2$ -purged solutions of **1NPH** in IP, Tol and DMSO.

**Table ESI.7.** Triplet properties of **1NPH** in solvents of different polarizability.

| Solvent | $\Phi_T (N_2)$ | $\lambda_T / \text{nm}$ | $\tau_T (N_2) / \mu\text{s}$ | $k_T / 10^7 \text{ s}^{-1}$ |
|---------|----------------|-------------------------|------------------------------|-----------------------------|
| IP      | 0.01           | 470                     | 1.68                         | 0.088                       |
| DMSO    | 0.01           | 490                     | 18.9                         | 0.087                       |
| Tol     | 0.02           | 490                     | 14.5                         | 0.204                       |

#### 4. Ultrafast Spectroscopy

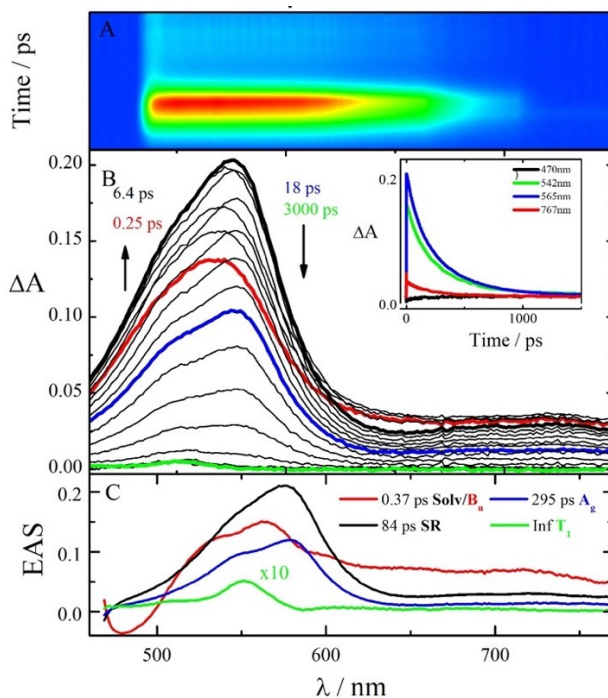

**Figure.ESI.8.** Femtosecond Transient Absorption measurements of compound **2,5-(PhBu)<sub>2</sub>T** in Tol: experimental 3D data matrix (panel A); main time-resolved absorption spectra (panel B) and representative kinetics recorded at significant wavelengths (inset); Evolution Associated Spectra (EAS) obtained by Global Analysis.

**Table ESI.8.** Femtosecond transient absorption and fluorescence up conversion measurements of compound **2,5-(PhBu)<sub>2</sub>T** in solvents of different polarizability.

| Solvent   | $\tau_{TA} / \text{ps}$ | $\tau_{FUC} / \text{ps}$ | Assignment            |
|-----------|-------------------------|--------------------------|-----------------------|
| IP        | 0.63                    | 0.31                     | Solv./B <sub>u</sub>  |
|           | 55                      | 30                       | SR                    |
|           | 280                     | 305                      | A <sub>g</sub>        |
|           | Inf                     |                          | T <sub>1</sub>        |
| MeCH/3-MP | 0.30                    | 0.35                     | Solv./ B <sub>u</sub> |
|           | 67                      | 67                       | SR                    |
|           | 260                     | 240                      | A <sub>g</sub>        |
|           | Inf                     |                          | T <sub>1</sub>        |
| DMSO      | 0.52                    | 0.64                     | Solv./B <sub>u</sub>  |
|           | 8.2                     | 8.8                      | SR                    |
|           | 290                     | 250                      | A <sub>g</sub>        |
|           | Inf                     |                          | T <sub>1</sub>        |
| Tol       | 0.37                    | 0.32                     | Solv./ B <sub>u</sub> |
|           | 84                      | 9.0                      | VC                    |
|           | 295                     | 82                       | A <sub>g</sub>        |
|           | Inf                     |                          | T <sub>1</sub>        |

|     |      |      |                       |
|-----|------|------|-----------------------|
| BrN | 0.84 | 0.96 | Solv./ B <sub>u</sub> |
|     | 70   | 25   | SR                    |
|     | 315  | 400  | A <sub>g</sub>        |
|     | Inf  |      | T <sub>1</sub>        |

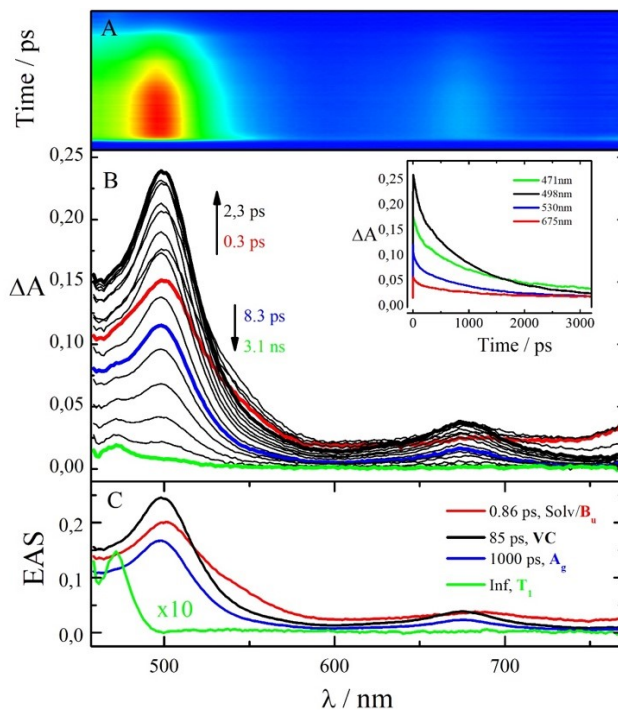

**Figure.ESI.9.** Femtosecond Transient Absorption measurements of compound **D2TO** in Tol: experimental 3D data matrix (panel A); main time-resolved absorption spectra (panel B) and representative kinetics recorded at significant wavelengths (inset); Evolution Associated Spectra (EAS) obtained by Global Analysis.

**Table ESI.9.** Femtosecond transient absorption and fluorescence up conversion measurements of compound **D2TO** in solvents of different polarizability.

| Solvent  | $\tau_{TA}$ / ps | $\tau_{FUC}$ / ps | Assignment            |
|----------|------------------|-------------------|-----------------------|
| IP       | 0.75             |                   | Solv./ B <sub>u</sub> |
|          | 45               |                   | VC                    |
|          | 955              |                   | A <sub>g</sub>        |
| MeCH/3MP | 0.36             | 0.28              | Solv./ B <sub>u</sub> |
|          | 74               | 74                | VC                    |
|          | 900              | 1000              | A <sub>g</sub>        |
| DMSO     | 0.63             | 0.32              | Solv./ B <sub>u</sub> |
|          | 270              | 205               | VC                    |
|          | 1140             | 1000              | A <sub>g</sub>        |
| Tol      | 0.86             | 0.32              | Solv./ B <sub>u</sub> |
|          | 85               | 90                | VC                    |
|          | 1000             | 840               | A <sub>g</sub>        |
|          | Inf              |                   | T <sub>1</sub>        |
| BrN      | 0.78             | 0.46              | Solv./ B <sub>u</sub> |

|  |      |     |       |
|--|------|-----|-------|
|  | 115  | 72  | VC    |
|  | 1000 | 690 | $A_g$ |
|  | Inf  |     | $T_1$ |

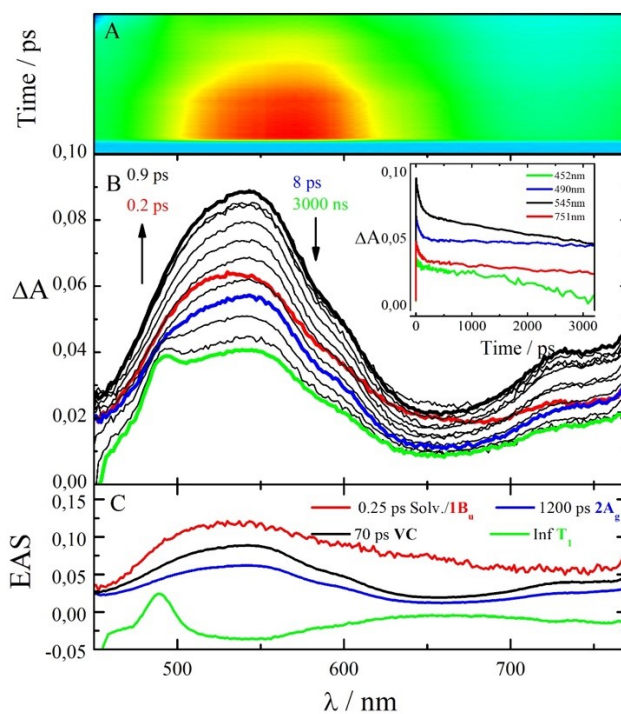

**Figure.ESI.10.** Femtosecond Transient Absorption measurements of compound **1NPH** in Tol: experimental 3D data matrix (panel A); main time-resolved absorption spectra (panel B) and representative kinetics recorded at significant wavelengths (inset); Evolution Associated Spectra (EAS) obtained by Global Analysis.

**Table ESI.10.** Femtosecond transient absorption and fluorescence up conversion measurements of compound **1NPH** in solvents of different polarizability.

| Solvent  | $\tau_{TA}$ / ps | $\tau_{FUC}$ / ps | Assignment   |
|----------|------------------|-------------------|--------------|
| IP       | 0.32             | 0.48              | Solv./ $B_u$ |
|          | 33               | 32                | VC           |
|          | 9400             | 9400              | $A_g$        |
|          | Inf              |                   | $T_1$        |
| MeCH/3MP | 0.21             | 1.8               | Solv./ $B_u$ |
|          | 67               | 71                | VC           |
|          | 11000            | 6700              | $A_g$        |
|          | Inf              |                   | $T_1$        |
| DMSO     | 0.67             |                   | Solv./ $B_u$ |
|          | 255              |                   | VC           |
|          | 11500            |                   | $A_g$        |
|          | Inf              |                   | $T_1$        |
| Tol      | 0.25             |                   | Solv./ $B_u$ |
|          | 70               |                   | VC           |

|     |                             |                      |                                      |
|-----|-----------------------------|----------------------|--------------------------------------|
|     | 12000<br>Inf                |                      | $A_g$<br>$T_1$                       |
| BrN | 0.64<br>205<br>12000<br>Inf | 0.64<br>440<br>12000 | Solv./ $B_u$<br>VC<br>$A_g$<br>$T_1$ |

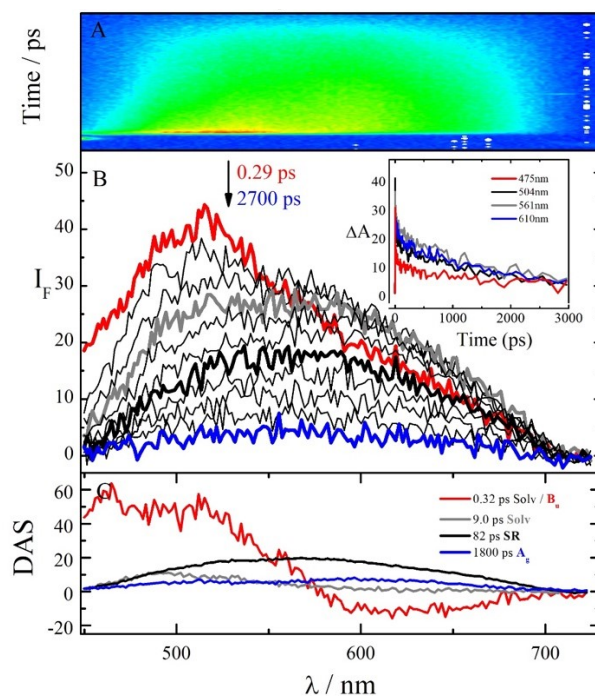

**Figure.ESI.11.** Femtosecond Fluorescence Up-Conversion measurements of compound **2,5-(2TE)<sub>2</sub>T** in Tol: experimental 3D data matrix (panel A); main time-resolved absorption spectra (panel B) and representative kinetics recorded at significant wavelengths (inset); Decay Associated Spectra (DAS) obtained by Global Analysis.

**Table ESI.11.** Femtosecond transient absorption and fluorescence up conversion measurements of compound **2,5-(2TE)<sub>2</sub>T** in solvents of different polarizability.

| Solvent | $\tau_{TA}$ / ps | $\tau_{FUC}$ / ps | Assignment             |
|---------|------------------|-------------------|------------------------|
| Hx/PFHx | 0.44             | 0.58              | Solv./B <sub>u</sub>   |
|         | 42               | 34                | SR                     |
|         | 2100             | 2100              | A <sub>g</sub>         |
|         | Inf              |                   | T <sub>1</sub>         |
| IP      | 0.93             | 0.50              | Solv./B <sub>u</sub>   |
|         | 29               | 25                | SR                     |
|         | 1400             | 1100              | A <sub>g</sub>         |
|         | Inf              |                   | T <sub>1</sub>         |
| DMSO    | 0.64             | 0.64              | Solv./B <sub>u</sub>   |
|         | 10               | 8.8               | Solv.                  |
|         | 140              | 250               | SR                     |
|         | 1900             | 1900              | A <sub>g</sub>         |
| Tol     | 0.24             | 0.32              | Solv. / B <sub>u</sub> |
|         | 6.9              | 9.0               | Solv.                  |
|         | 72               | 82                | SR                     |
|         | 1800             | 1800              | A <sub>g</sub>         |
| BrN     | 0.76             | 0.45              | Solv.                  |
|         | 6.0              | 6.3               | Solv.                  |
|         | 120              | 240               | SR                     |
|         | 1500             | 1500              | A <sub>g</sub>         |
|         | Inf              |                   | T <sub>1</sub>         |

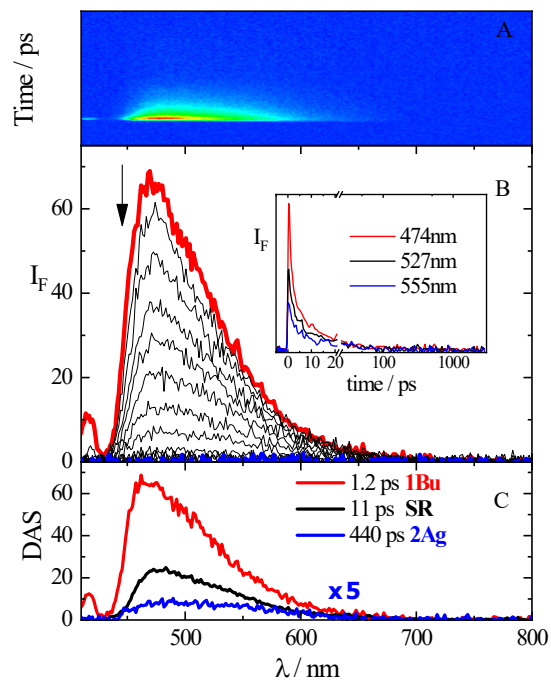

**Figure.ESI.12.** Femtosecond Fluorescence Up-Conversion measurements of compound **PN** in Tol: experimental 3D data matrix (panel A); main time-resolved absorption spectra (panel B) and representative kinetics recorded at significant wavelengths (inset); Decay Associated Spectra (DAS) obtained by Global Analysis.

**Table ESI.12.** Femtosecond transient absorption and fluorescence up conversion measurements of compound **PN** in solvents of different polarizability.

| Solvent         | $\tau_{TA}$ / ps                | Assignment                                                              |
|-----------------|---------------------------------|-------------------------------------------------------------------------|
| Tol             | 0.36<br>1.3<br>12<br>365<br>Inf | Solv./B <sub>u</sub><br>Solv.<br>SR<br>A <sub>g</sub><br>T <sub>1</sub> |
| Tol/An 7:3      | 0.66<br>14<br>380<br>Inf        | Solv./B <sub>u</sub><br>SR<br>A <sub>g</sub><br>T <sub>1</sub>          |
| Tol/An 1:1      | 0.54<br>5.7<br>85<br>400<br>Inf | Solv./B <sub>u</sub><br>SR<br>ICT<br>A <sub>g</sub><br>T <sub>1</sub>   |
| Tol/An 3:7      | 1.0<br>10<br>200<br>Inf         | Solv./B <sub>u</sub><br>SR<br>ICT<br>T <sub>1</sub>                     |
| An <sup>a</sup> | 1.8<br>8.7<br>360<br>Inf        | Solv./B <sub>u</sub><br>SR<br>ICT<br>T <sub>1</sub>                     |
| DMSO            | 0.60<br>4.2<br>92<br>1500       | Solv./B <sub>u</sub><br>Solv.<br>SR<br>ICT                              |

<sup>a</sup> from ref.<sup>19</sup>

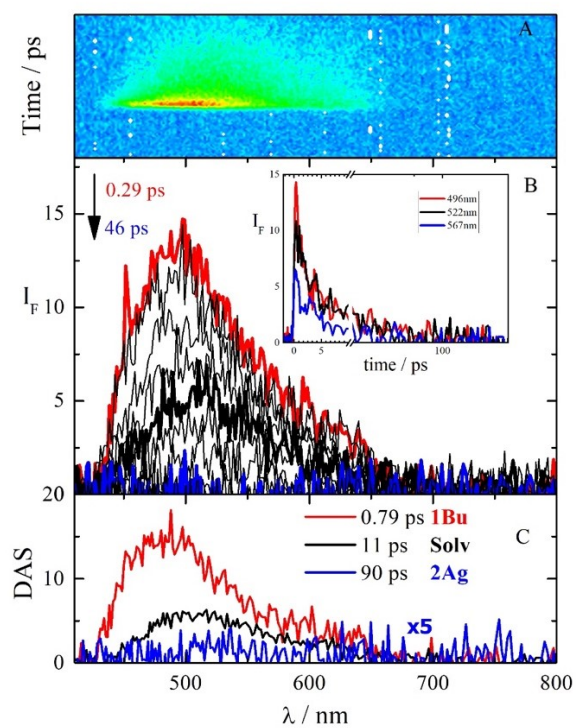

**Figure.ESI.13.** Femtosecond Fluorescence Up-Conversion measurements of compound **DF** in Tol: experimental 3D data matrix (panel A); main time-resolved absorption spectra (panel B) and representative kinetics recorded at significant wavelengths (inset); Decay Associated Spectra (DAS) obtained by Global Analysis.



**Table ESI.13.** Femtosecond transient absorption and fluorescence up conversion measurements of compound **DF** in solvents of different polarizability.

| Solvent                 | $\tau_{TA}$ / ps                 | $\tau_{FUC}$ / ps | Assignment                                                   |
|-------------------------|----------------------------------|-------------------|--------------------------------------------------------------|
| MeCH/3-MP               | 0.20<br>3.9<br>33<br>Inf         |                   | Solv. / $B_u$<br>Solv. / VC<br>$A_g$<br>$T_1$                |
| DHN                     | 0.25<br>7.6<br>58<br>Inf         |                   | Solv. / $B_u$<br>Solv. / VC<br>$A_g$<br>$T_1$                |
| Tol <sup>a</sup>        | 0.86<br>9.2<br>89<br>Inf         | 0.79<br>11<br>90  | Solv. / $B_u$<br>Solv. / VC<br>$A_g$<br>$T_1$                |
| Tol/An 9:1              | 0.57<br>7.5<br>49<br>Inf         |                   | Solv. / $B_u$<br>Solv. / VC<br>$A_g$ (little ICT)<br>$T_1$   |
| Tol/An 7:3              | 0.49<br>7.1<br>64<br>Inf         |                   | Solv. / $B_u$<br>Solv. / VC<br>$A_g$ mixed with ICT<br>$T_1$ |
| Tol/An 5:5 <sup>a</sup> | 1.8<br>5.4<br>80<br>Inf          |                   | Solv. / $B_u$<br>Solv. / VC<br>$A_g$ mixed with ICT<br>$T_1$ |
| An <sup>a</sup>         | 0.89<br>7.2<br>320<br>Inf        |                   | Solv. / $B_u$<br>Solv. / VC<br>ICT<br>$T_1$                  |
| BrN                     | 0.94<br>250<br>Inf               |                   | Solv.<br>$B_u$<br>$T_1$                                      |
| DMSO <sup>a</sup>       | 0.46<br>2.8<br>84<br>1820<br>Inf |                   | Solv. / $B_u$<br>Solv.<br>VC (ICT)<br>ICT<br>$T_1$           |

<sup>a</sup> from ref. 7

**Table ESI.14.** Comparison between  $T_1$  (green) and  $2A_g$  (blue) ESA band as obtained by fs-TA experiments in the nanosecond and femtosecond regime for **2,5-(2TE)<sub>2</sub>T** in solvents of different polarizability.  $\Delta\lambda$  and  $\Delta E$  relate to the  $T_1$  spectral profile and  $2A_g$  spectrum as obtained by fs-TA experiments.

| Solvent | $\lambda_{T_1}$ / nm<br>(ns-TA) | $\lambda_{T_1}$ / nm<br>(fs-TA) | $\lambda_{2A_g}$ / nm<br>(fs-TA) | $\Delta\lambda$ /nm | $\Delta E$ / $\text{cm}^{-1}$ | $\Delta E$ / eV | $\Phi_T$ |
|---------|---------------------------------|---------------------------------|----------------------------------|---------------------|-------------------------------|-----------------|----------|
| Hx/PFHx | 510                             | 510                             | 529                              | 19                  | 704                           | 0.087           | 0.09     |
| IP      | 510                             | 513                             | 533                              | 20                  | 731                           | 0.091           | 0.09     |
| DMSO    | 540                             | 531                             | 550                              | 21                  | 651                           | 0.081           | 0.18     |
| Tol     | 540                             | 539                             | 550                              | 11                  | 371                           | 0.046           | 0.14     |
| BrN     | 550                             | 558                             | 566                              | 8                   | 253                           | 0.031           | 0.19     |

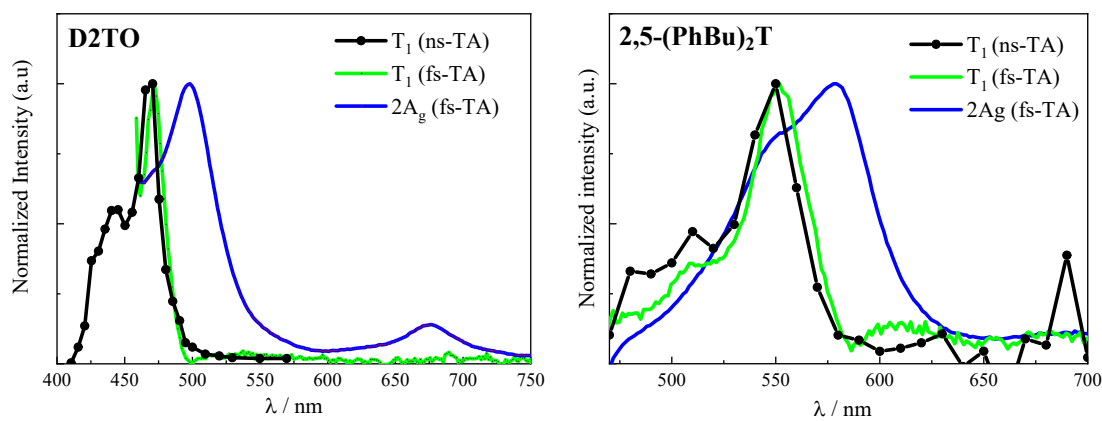

**Figure.ESI.14.** Comparison between  $T_1$  ESA spectra as obtained by ns-TA (black, scattered-line) and by fs-TA (green line) experiments and  $2A_g$  ESA spectra as obtained by fs-TA experiments (blue) for compounds **D2TO** (left) and **2,5-(PhBu)<sub>2</sub>T** (right) in Tol.

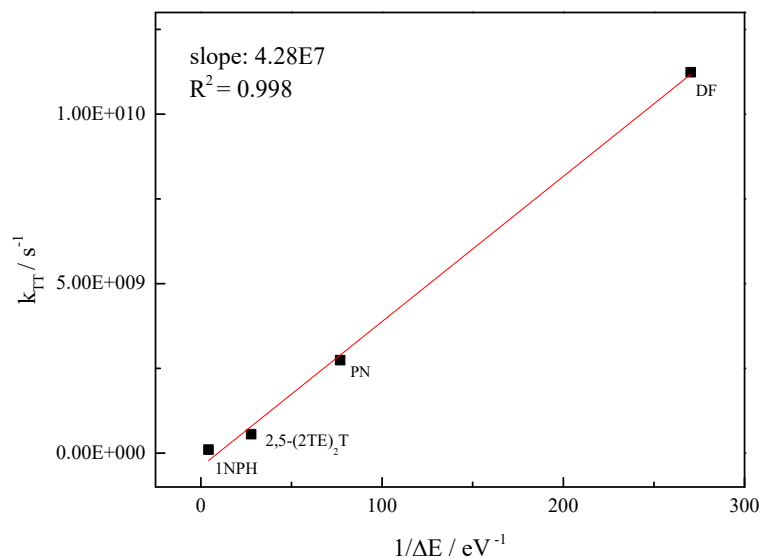

**Figure.ESI.15.** Linear fitting of the  $k_{TT}=1/\tau_{Ag}$  in function of the  $1/\Delta E$ , from the data reported in **Table 5** of the main paper. The  $\Delta E$  are obtained from the difference between fs-TA ESA spectra of the 2Ag and  $T_1$  states. The lifetimes of the Ag state are obtained from the fitting of fs-TA measurements.

## 5. Phosphorescence measurements

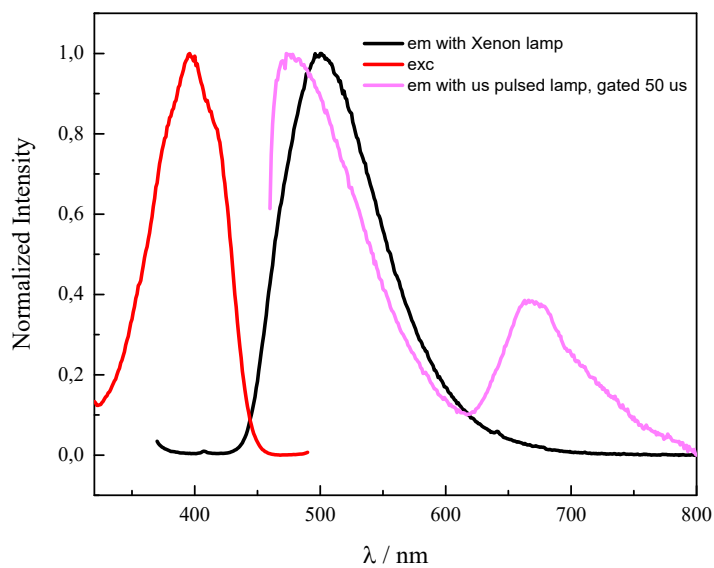

**Figure.ESI.16.** Comparison between emission and excitation spectra of **DF** recorded at 77 K in MeCH-3MP matrix with different excitation sources.

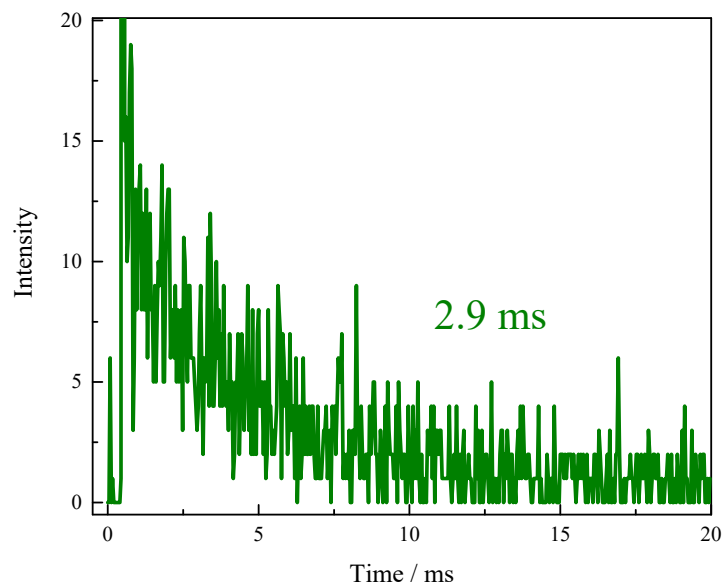

**Figure.ESI.17.** Phosphorescence kinetic at 670 nm of **DF** recorded at 77 K in MeCH/3-MP matrix excited by 25 Hz pulsed lamp.

## 6. Quantum mechanical calculations

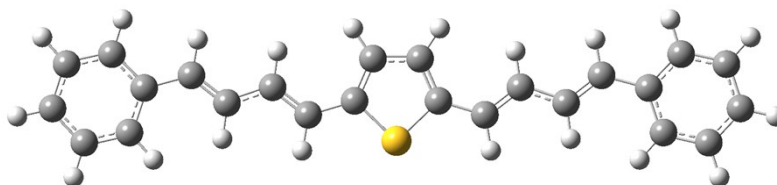

**Figure ESI.18.** Optimized  $S_0$  geometry of compound **2,5-(PhBu)<sub>2</sub>T**. Model: CAM-B3LYP/6-31+G(d,p) @  $S_0$  in cyclohexane.

**Table ESI.15.** Absorption and emission wavelengths ( $\lambda$ ), oscillator strength (f) and molecular orbitals of **2,5-(PhBu)<sub>2</sub>T** in cyclohexane (CPCM) calculated by the CAM-B3LYP/6-31+G(d,p)//CAM-B3LYP/6-31+G(d,p) model, together with the experimental absorption and emission maxima.

| Transition               | $\lambda_{th}/nm$ | f      | MO                                  | %  | $\lambda_{exp}/nm$ |
|--------------------------|-------------------|--------|-------------------------------------|----|--------------------|
| $S_0 \rightarrow T_1$    | 1016              | 0.0000 | $\pi_H \rightarrow \pi_L^*$         | 86 |                    |
| $S_0 \rightarrow T_2$    | 648               | 0.0000 | $\pi_{H-1} \rightarrow \pi_L^*$     | 39 |                    |
|                          |                   |        | $\pi_H \rightarrow \pi_{L+1}^*$     | 46 |                    |
| $S_0 \rightarrow T_3$    | 437               | 0.0000 | $\pi_{H-2} \rightarrow \pi_L^*$     | 27 |                    |
|                          |                   |        | $\pi_{H-1} \rightarrow \pi_{L+1}^*$ | 24 |                    |
|                          |                   |        | $\pi_H \rightarrow \pi_{L+2}^*$     | 23 |                    |
| $S_0 \rightarrow S_1$    | 425               | 2.7004 | $\pi_H \rightarrow \pi_L^*$         | 92 | 420*               |
| $S_0 \rightarrow T_4$    | 368               | 0.0000 | $\pi_{H-2} \rightarrow \pi_{L+1}^*$ | 19 |                    |
|                          |                   |        | $\pi_H \rightarrow \pi_{L+10}^*$    | 21 |                    |
| $S_0 \rightarrow T_5$    | 322               | 0.0000 | $\pi_{H-7} \rightarrow \pi_L^*$     | 14 |                    |
|                          |                   |        | $\pi_{H-6} \rightarrow \pi_{L+1}^*$ | 11 |                    |
|                          |                   |        | $\pi_{H-4} \rightarrow \pi_{L+4}^*$ | 11 |                    |
|                          |                   |        | $\pi_{H-3} \rightarrow \pi_{L+3}^*$ | 15 |                    |
| $S_0 \rightarrow S_2$    | 321               | 0.0042 | $\pi_H \rightarrow \pi_{L+1}^*$     | 67 |                    |
| $S_0 \rightarrow T_6$    | 312               | 0.0000 | $\pi_{H-5} \rightarrow \pi_L^*$     | 49 |                    |
| $S_0 \rightarrow T_7$    | 295               | 0.0000 | $\pi_{H-5} \rightarrow \pi_L^*$     | 25 |                    |
| $S_0 \rightarrow T_8$    | 290               | 0.0000 | $\pi_{H-1} \rightarrow \pi_L^*$     | 15 |                    |
|                          |                   |        | $\pi_H \rightarrow \pi_{L+1}^*$     | 19 |                    |
|                          |                   |        | $\pi_H \rightarrow \pi_{L+3}^*$     | 15 |                    |
| $S_0 \rightarrow T_9$    | 288               | 0.0000 | $\pi_{H-1} \rightarrow \pi_{L+3}^*$ | 21 |                    |
|                          |                   |        | $\pi_H \rightarrow \pi_{L+4}^*$     | 18 |                    |
| $S_0 \rightarrow T_{10}$ | 286               | 0.0000 | $\pi_{H-4} \rightarrow \pi_{L+1}^*$ | 13 |                    |
|                          |                   |        | $\pi_{H-3} \rightarrow \pi_L^*$     | 13 |                    |
|                          |                   |        | $\pi_{H-1} \rightarrow \pi_{L+4}^*$ | 11 |                    |
|                          |                   |        | $\pi_H \rightarrow \pi_{L+1}^*$     | 11 |                    |
| $S_0 \rightarrow S_3$    | 284               | 0.0019 | $\pi_{H-1} \rightarrow \pi_L^*$     | 63 |                    |
| $S_0 \rightarrow S_4$    | 264               | 0.2594 | $\pi_H \rightarrow \pi_{L+2}^*$     | 47 |                    |

|                          |     |        |                                 |    |      |
|--------------------------|-----|--------|---------------------------------|----|------|
| $S_0 \rightarrow S_5$    | 257 | 0.0060 | $\pi_H \rightarrow \pi_{L+3}^*$ | 37 |      |
| $S_0 \rightarrow S_6$    | 254 | 0.1412 | $\pi_{H-4} \rightarrow \pi_L^*$ | 16 |      |
|                          |     |        | $\pi_H \rightarrow \pi_{L+4}^*$ | 23 |      |
| $S_0 \rightarrow S_7$    | 253 | 0.0005 | $\pi_H \rightarrow \pi_{L+6}^*$ | 60 |      |
| $S_0 \rightarrow S_8$    | 249 | 0.0896 | $\pi_{H-5} \rightarrow \pi_L^*$ | 74 |      |
| $S_0 \rightarrow S_9$    | 244 | 0.0000 | $\pi_H \rightarrow \pi_{L+5}^*$ | 74 |      |
| $S_0 \rightarrow S_{10}$ | 243 | 0.0186 | $\pi_{H-2} \rightarrow \pi_L^*$ | 38 |      |
|                          |     |        | $\pi_H \rightarrow \pi_{L+2}^*$ | 30 |      |
| $S_1 \rightarrow S_0$    | 552 | 2.7326 | $\pi_H \rightarrow \pi_L^*$     | 96 | 561* |

\*From the spectra recorded in MeCH/3-MP 9:1

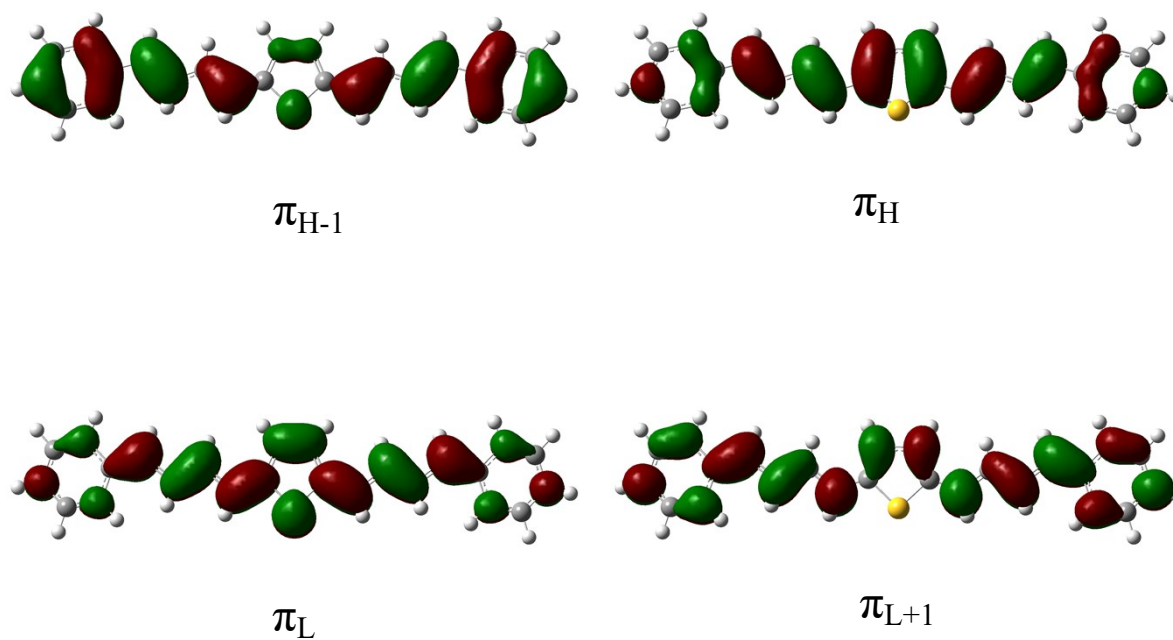

Figure ESI.19. Frontier molecular orbitals of **2,5-(PhBu)<sub>2</sub>T**.

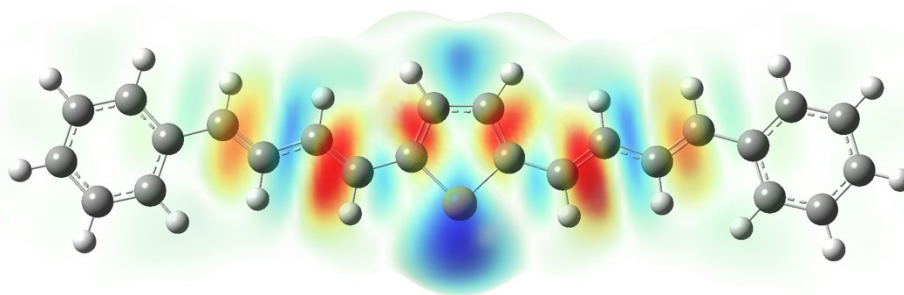

Figure ESI.20. Effect of the  $S_0 \rightarrow S_1$  transition on the electron density of **2,5-(PhBu)<sub>2</sub>T**; increase and decrease of electron densities are represented by blue (+0.00007) and red (-0.00007), respectively.

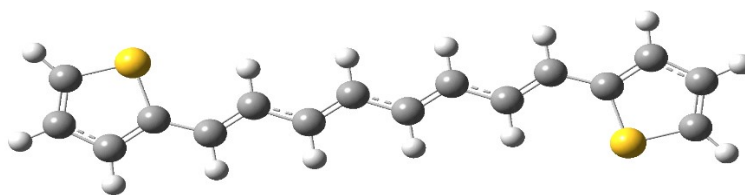

**Figure ESI.21.** Optimized  $S_0$  geometry of compound **D2TO**. Model: CAM-B3LYP/6-31+G(d,p) @  $S_0$  in cyclohexane.

**Table ESI.16.** Absorption and emission wavelengths ( $\lambda$ ), oscillator strength (f) and molecular orbitals of **D2TO** in cyclohexane (CPCM) calculated by the CAM-B3LYP/6-31+G(d,p)//CAM-B3LYP/6-31+G(d,p) model, together with the experimental absorption and emission maxima.

| Transition               | $\lambda_{th}/nm$ | f      | MO                                  | %  | $\lambda_{exp}/nm$ |
|--------------------------|-------------------|--------|-------------------------------------|----|--------------------|
| $S_0 \rightarrow T_1$    | 1196              | 0.0000 | $\pi_H \rightarrow \pi_L^*$         | 99 |                    |
| $S_0 \rightarrow T_2$    | 576               | 0.0000 | $\pi_{H-1} \rightarrow \pi_L^*$     | 45 |                    |
|                          |                   |        | $\pi_H \rightarrow \pi_{L+1}^*$     | 43 |                    |
| $S_0 \rightarrow T_3$    | 411               | 0.0000 | $\pi_{H-4} \rightarrow \pi_L^*$     | 31 |                    |
|                          |                   |        | $\pi_{H-1} \rightarrow \pi_{L+1}^*$ | 28 |                    |
|                          |                   |        | $\pi_H \rightarrow \pi_{L+5}^*$     | 27 |                    |
| $S_0 \rightarrow S_1$    | 410               | 2.5046 | $\pi_H \rightarrow \pi_L^*$         | 94 | 396*               |
| $S_0 \rightarrow T_4$    | 329               | 0.0000 | $\pi_{H-5} \rightarrow \pi_L^*$     | 26 |                    |
| $S_0 \rightarrow T_5$    | 301               | 0.0000 | $\pi_{H-3} \rightarrow \pi_{L+1}^*$ | 34 |                    |
|                          |                   |        | $\pi_{H-2} \rightarrow \pi_L^*$     | 43 |                    |
| $S_0 \rightarrow S_2$    | 301               | 0.0000 | $\pi_{H-1} \rightarrow \pi_L^*$     | 46 |                    |
|                          |                   |        | $\pi_H \rightarrow \pi_{L+1}^*$     | 48 |                    |
| $S_0 \rightarrow T_6$    | 301               | 0.0000 | $\pi_{H-3} \rightarrow \pi_L^*$     | 48 |                    |
| $S_0 \rightarrow T_7$    | 281               | 0.0000 | $\pi_{H-1} \rightarrow \pi_L^*$     | 43 |                    |
|                          |                   |        | $\pi_H \rightarrow \pi_{L+1}^*$     | 45 |                    |
| $S_0 \rightarrow T_8$    | 276               | 0.0000 | $\pi_{H-6} \rightarrow \pi_L^*$     | 23 |                    |
| $S_0 \rightarrow S_3$    | 275               | 0.0000 | $\pi_{H-1} \rightarrow \pi_L^*$     | 46 |                    |
|                          |                   |        | $\pi_H \rightarrow \pi_{L+1}^*$     | 44 |                    |
| $S_0 \rightarrow T_9$    | 250               | 0.0000 | $\pi_H \rightarrow \pi_{L+12}^*$    | 28 |                    |
| $S_0 \rightarrow T_{10}$ | 246               | 0.0000 | $\pi_H \rightarrow \pi_{L+3}^*$     | 37 |                    |
|                          |                   |        | $\pi_H \rightarrow \pi_{L+4}^*$     | 47 |                    |
| $S_0 \rightarrow S_4$    | 244               | 0.3104 | $\pi_{H-2} \rightarrow \pi_L^*$     | 55 |                    |
| $S_0 \rightarrow S_5$    | 244               | 0.0001 | $\pi_H \rightarrow \pi_{L+4}^*$     | 54 |                    |
| $S_0 \rightarrow S_6$    | 242               | 0.0000 | $\pi_{H-3} \rightarrow \pi_L^*$     | 67 |                    |
| $S_0 \rightarrow S_7$    | 241               | 0.0075 | $\pi_H \rightarrow \pi_{L+6}^*$     | 44 |                    |
| $S_0 \rightarrow S_8$    | 235               | 0.0000 | $\pi_H \rightarrow \pi_{L+2}^*$     | 56 |                    |
| $S_0 \rightarrow S_9$    | 230               | 0.0031 | $\pi_H \rightarrow \pi_{L+3}^*$     | 36 |                    |
|                          |                   |        | $\pi_H \rightarrow \pi_{L+4}^*$     | 31 |                    |
| $S_0 \rightarrow S_{10}$ | 230               | 0.0428 | $\pi_{H-4} \rightarrow \pi_L^*$     | 60 |                    |
| $S_1 \rightarrow S_0$    | 534               | 2.5856 | $\pi_H \rightarrow \pi_L^*$         | 97 | 579*               |

\*From the spectra recorded in MeCH/3-MP 9:1

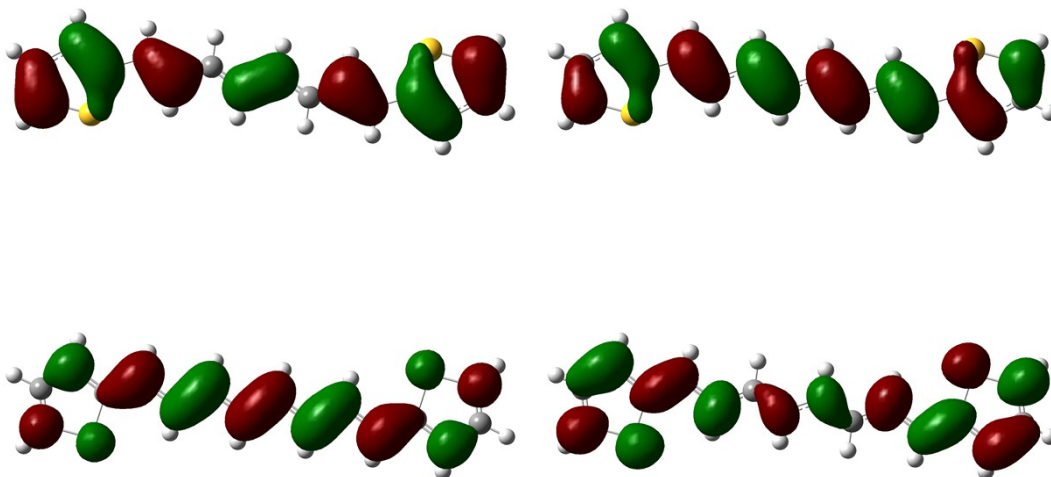

**Figure ESI.22.** Frontier molecular orbitals of **D2TO**.

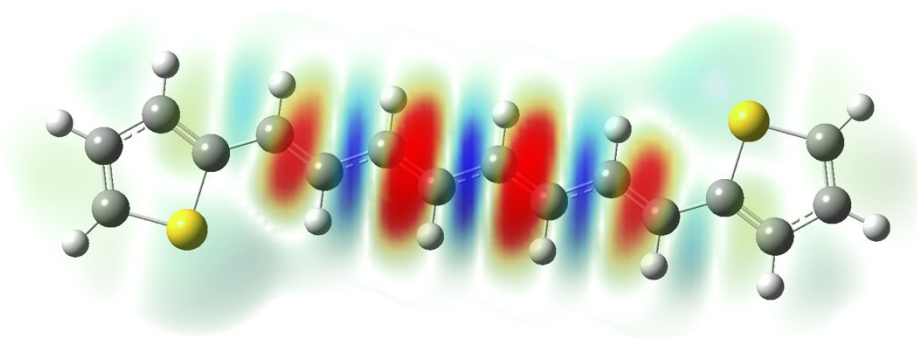

**Figure ESI.23.** Effect of the  $S_0 \rightarrow S_1$  transition on the electron density of **D2TO**; increase and decrease of electron densities are represented by blue (+0.00008) and red (-0.00008), respectively.



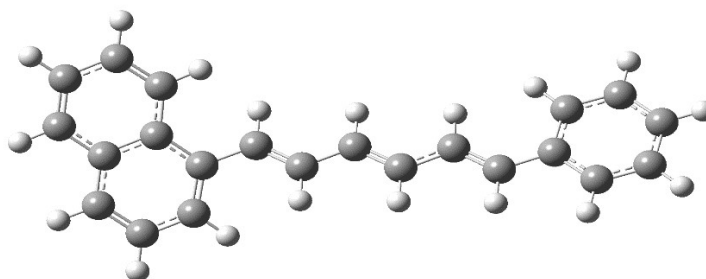

**Figure ESI.24.** Optimized  $S_0$  geometry of compound **1NPH**. Model: CAM-B3LYP/6-31+G(d,p) @  $S_0$  in cyclohexane.

**Table ESI.17.** Absorption and emission wavelengths ( $\lambda$ ), oscillator strength (f) and molecular orbitals of **1NPH** in cyclohexane (CPCM) calculated by the CAM-B3LYP/6-31+G(d,p)//CAM-B3LYP/6-31+G(d,p) model, together with the experimental absorption and emission maxima.

| Transition               | $\lambda_{th}/nm$ | f      | MO                                  | %  | $\lambda_{exp}/nm$ |
|--------------------------|-------------------|--------|-------------------------------------|----|--------------------|
| $S_0 \rightarrow T_1$    | 833               | 0.0000 | $\pi_H \rightarrow \pi_L^*$         | 84 |                    |
| $S_0 \rightarrow T_2$    | 509               | 0.0000 | $\pi_{H-1} \rightarrow \pi_L^*$     | 34 |                    |
|                          |                   |        | $\pi_H \rightarrow \pi_{L+1}^*$     | 34 |                    |
| $S_0 \rightarrow T_3$    | 400               | 0.0000 | $\pi_{H-4} \rightarrow \pi_L^*$     | 25 |                    |
|                          |                   |        | $\pi_{H-1} \rightarrow \pi_{L+1}^*$ | 21 |                    |
| $S_0 \rightarrow S_1$    | 366               | 2.0698 | $\pi_H \rightarrow \pi_L^*$         | 94 | 359*               |
| $S_0 \rightarrow T_4$    | 328               | 0.0000 | $\pi_{H-5} \rightarrow \pi_L^*$     | 14 |                    |
|                          |                   |        | $\pi_{H-2} \rightarrow \pi_{L+3}^*$ | 13 |                    |
| $S_0 \rightarrow T_5$    | 309               | 0.0000 | $\pi_{H-2} \rightarrow \pi_L^*$     | 21 |                    |
|                          |                   |        | $\pi_{H-2} \rightarrow \pi_{L+1}^*$ | 22 |                    |
|                          |                   |        | $\pi_{H-1} \rightarrow \pi_{L+2}^*$ | 20 |                    |
|                          |                   |        | $\pi_H \rightarrow \pi_{L+2}^*$     | 21 |                    |
| $S_0 \rightarrow T_6$    | 298               | 0.0000 | $\pi_{H-3} \rightarrow \pi_{L+3}^*$ | 19 |                    |
| $S_0 \rightarrow T_7$    | 292               | 0.0000 | $\pi_{H-2} \rightarrow \pi_L^*$     | 23 |                    |
|                          |                   |        | $\pi_{H-2} \rightarrow \pi_{L+1}^*$ | 24 |                    |
|                          |                   |        | $\pi_{H-1} \rightarrow \pi_{L+2}^*$ | 21 |                    |
|                          |                   |        | $\pi_H \rightarrow \pi_{L+2}^*$     | 25 |                    |
| $S_0 \rightarrow S_2$    | 288               | 0.0777 | $\pi_{H-1} \rightarrow \pi_L^*$     | 40 |                    |
|                          |                   |        | $\pi_H \rightarrow \pi_{L+1}^*$     | 50 |                    |
| $S_0 \rightarrow T_8$    | 287               | 0.0000 | $\pi_{H-3} \rightarrow \pi_L^*$     | 19 |                    |
|                          |                   |        | $\pi_H \rightarrow \pi_{L+3}^*$     | 21 |                    |
| $S_0 \rightarrow S_3$    | 277               | 0.0000 | $\pi_{H-2} \rightarrow \pi_L^*$     | 25 |                    |
|                          |                   |        | $\pi_{H-2} \rightarrow \pi_{L+1}^*$ | 21 |                    |
|                          |                   |        | $\pi_{H-1} \rightarrow \pi_{L+2}^*$ | 21 |                    |
|                          |                   |        | $\pi_H \rightarrow \pi_{L+2}^*$     | 28 |                    |
| $S_0 \rightarrow T_9$    | 275               | 0.0000 | $\pi_{H-2} \rightarrow \pi_{L+2}^*$ | 79 |                    |
| $S_0 \rightarrow T_{10}$ | 270               | 0.0000 | $\pi_{H-4} \rightarrow \pi_{L+3}^*$ | 11 |                    |
|                          |                   |        | $\pi_{H-3} \rightarrow \pi_{L+3}^*$ | 11 |                    |
| $S_0 \rightarrow S_4$    | 263               | 0.0014 | $\pi_{H-1} \rightarrow \pi_L^*$     | 49 |                    |
|                          |                   |        | $\pi_H \rightarrow \pi_{L+1}^*$     | 38 |                    |
| $S_0 \rightarrow S_5$    | 255               | 0.0112 | $\pi_H \rightarrow \pi_{L+3}^*$     | 36 |                    |
| $S_0 \rightarrow S_6$    | 243               | 0.0193 | $\pi_{H-1} \rightarrow \pi_{L+1}^*$ | 35 |                    |

|                          |     |        |                                                                    |          |      |
|--------------------------|-----|--------|--------------------------------------------------------------------|----------|------|
| $S_0 \rightarrow S_7$    | 233 | 0.5411 | $\pi_{H-2} \rightarrow \pi_L^*$<br>$\pi_H \rightarrow \pi_{L+2}^*$ | 25<br>32 |      |
| $S_0 \rightarrow S_8$    | 231 | 0.1412 | $\pi_H \rightarrow \pi_{L+4}^*$<br>$\pi_H \rightarrow \pi_{L+5}^*$ | 18<br>20 |      |
| $S_0 \rightarrow S_9$    | 228 | 0.0222 | $\pi_{H-4} \rightarrow \pi_L^*$                                    | 37       |      |
| $S_0 \rightarrow S_{10}$ | 226 | 0.0890 | $\pi_H \rightarrow \pi_{L+5}^*$<br>$\pi_H \rightarrow \pi_{L+6}^*$ | 28<br>20 |      |
| $S_1 \rightarrow S_0$    | 496 | 2.1163 | $\pi_H \rightarrow \pi_L^*$                                        | 97       | 472* |

\*From the spectra recorded in MeCH/3-MP 9:1

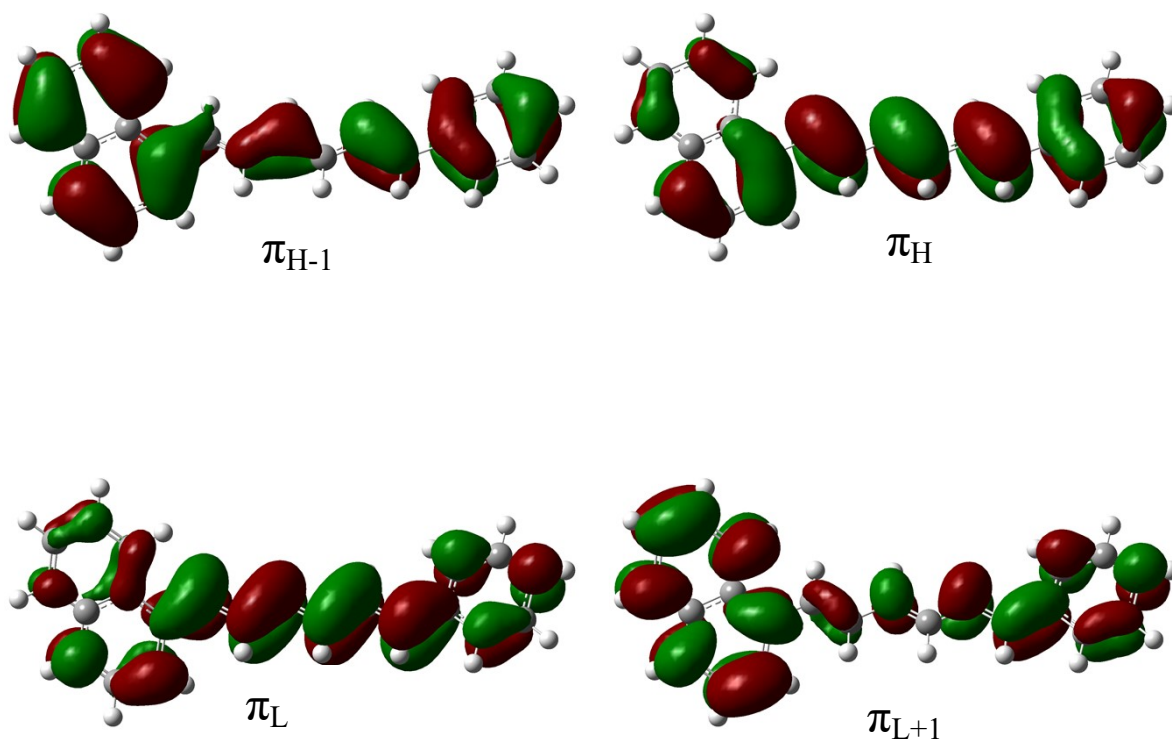

Figure ESI.25. Frontier molecular orbitals of 1NPH.

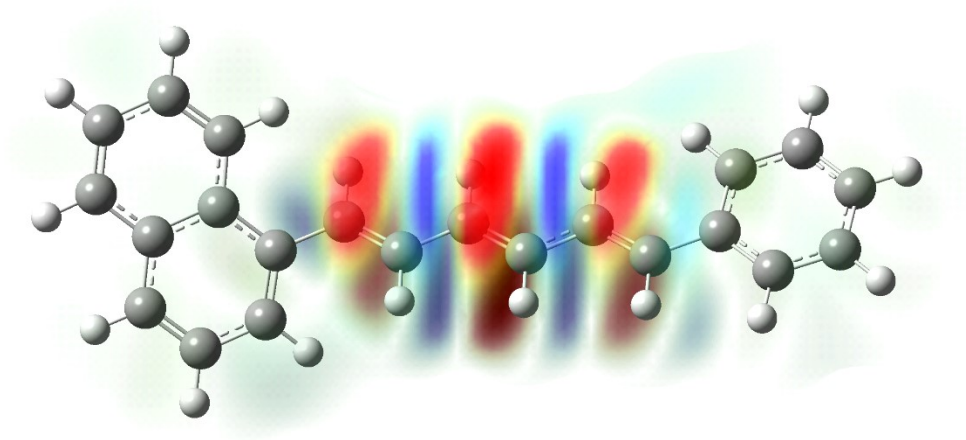

**Figure ESI.26.** Effect of the  $S_0 \rightarrow S_1$  transition on the electron density of **1NPH**; increase and decrease of electron densities are represented by blue (+0.00008) and red (-0.00008), respectively.

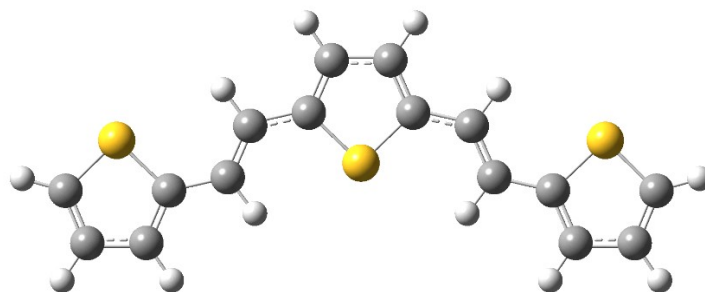

**Figure ESI.27.** Optimized  $S_0$  geometry of compound **2,5-(2TE)<sub>2</sub>T**. Model: CAM-B3LYP/6-31+G(d,p) @  $S_0$  in cyclohexane.

**Table ESI.18.** Absorption and emission wavelengths ( $\lambda$ ), oscillator strength (f) and molecular orbitals of **2,5-(2TE)<sub>2</sub>T** in cyclohexane (CPCM) calculated by the CAM-B3LYP/6-31+G(d,p)//CAM-B3LYP/6-31+G(d,p) model, together with the experimental absorption and emission maxima.

| Transition               | $\lambda_{th}/nm$ | f      | MO                                                                                                            | %              | $\lambda_{exp}/nm$ |
|--------------------------|-------------------|--------|---------------------------------------------------------------------------------------------------------------|----------------|--------------------|
| $S_0 \rightarrow T_1$    | 911               | 0.0000 | $\pi_H \rightarrow \pi_L^*$                                                                                   | 90             |                    |
| $S_0 \rightarrow T_2$    | 559               | 0.0000 | $\pi_{H-1} \rightarrow \pi_L^*$<br>$\pi_H \rightarrow \pi_{L+1}^*$                                            | 42<br>44       |                    |
| $S_0 \rightarrow S_1$    | 413               | 1.4416 | $\pi_H \rightarrow \pi_L^*$                                                                                   | 94             | 413*               |
| $S_0 \rightarrow T_3$    | 400               | 0.0000 | $\pi_{H-5} \rightarrow \pi_L^*$<br>$\pi_{H-1} \rightarrow \pi_{L+1}^*$<br>$\pi_H \rightarrow \pi_{L+3}^*$     | 29<br>27<br>28 |                    |
| $S_0 \rightarrow T_4$    | 322               | 0.0000 | $\pi_{H-4} \rightarrow \pi_L^*$                                                                               | 23             |                    |
| $S_0 \rightarrow T_5$    | 312               | 0.0000 | $\pi_{H-4} \rightarrow \pi_L^*$                                                                               | 53             |                    |
| $S_0 \rightarrow S_2$    | 304               | 0.2045 | $\pi_{H-1} \rightarrow \pi_L^*$<br>$\pi_H \rightarrow \pi_{L+1}^*$                                            | 45<br>48       |                    |
| $S_0 \rightarrow T_6$    | 301               | 0.0000 | $\pi_{H-3} \rightarrow \pi_{L+1}^*$<br>$\pi_{H-2} \rightarrow \pi_L^*$                                        | 33<br>44       |                    |
| $S_0 \rightarrow T_7$    | 300               | 0.0000 | $\pi_{H-3} \rightarrow \pi_L^*$<br>$\pi_{H-2} \rightarrow \pi_{L+1}^*$                                        | 46<br>32       |                    |
| $S_0 \rightarrow T_8$    | 279               | 0.0000 | $\pi_{H-1} \rightarrow \pi_L^*$<br>$\pi_H \rightarrow \pi_{L+1}^*$                                            | 42<br>41       |                    |
| $S_0 \rightarrow T_9$    | 273               | 0.0000 | $\pi_{H-8} \rightarrow \pi_L^*$<br>$\pi_{H-6} \rightarrow \pi_{L+1}^*$<br>$\pi_{H-5} \rightarrow \pi_{L+3}^*$ | 22<br>13<br>12 |                    |
| $S_0 \rightarrow S_3$    | 272               | 0.0000 | $\pi_{H-1} \rightarrow \pi_L^*$<br>$\pi_H \rightarrow \pi_{L+1}^*$                                            | 48<br>42       |                    |
| $S_0 \rightarrow S_4$    | 256               | 0.1028 | $\pi_{H-4} \rightarrow \pi_L^*$                                                                               | 85             |                    |
| $S_0 \rightarrow S_5$    | 251               | 0.0764 | $\pi_H \rightarrow \pi_{L+3}^*$                                                                               | 52             |                    |
| $S_0 \rightarrow T_{10}$ | 248               | 0.0000 | $\pi_H \rightarrow \pi_{L+7}^*$                                                                               | 35             |                    |
| $S_0 \rightarrow S_6$    | 243               | 0.0000 | $\pi_H \rightarrow \pi_{L+2}^*$                                                                               | 73             |                    |
| $S_0 \rightarrow S_7$    | 243               | 0.0140 | $\pi_{H-2} \rightarrow \pi_L^*$                                                                               | 60             |                    |
| $S_0 \rightarrow S_8$    | 242               | 0.2068 | $\pi_{H-3} \rightarrow \pi_L^*$                                                                               | 65             |                    |
| $S_0 \rightarrow S_9$    | 241               | 0.0011 | $\pi_H \rightarrow \pi_{L+7}^*$                                                                               | 35             |                    |
| $S_0 \rightarrow S_{10}$ | 230               | 0.0000 | $\pi_H \rightarrow \pi_{L+5}^*$                                                                               | 50             |                    |

|                       |     |        |                             |    |      |
|-----------------------|-----|--------|-----------------------------|----|------|
| $S_1 \rightarrow S_0$ | 533 | 1.4613 | $\pi_H \rightarrow \pi_L^*$ | 97 | 489* |
|-----------------------|-----|--------|-----------------------------|----|------|

\*From the spectra recorded in Tol

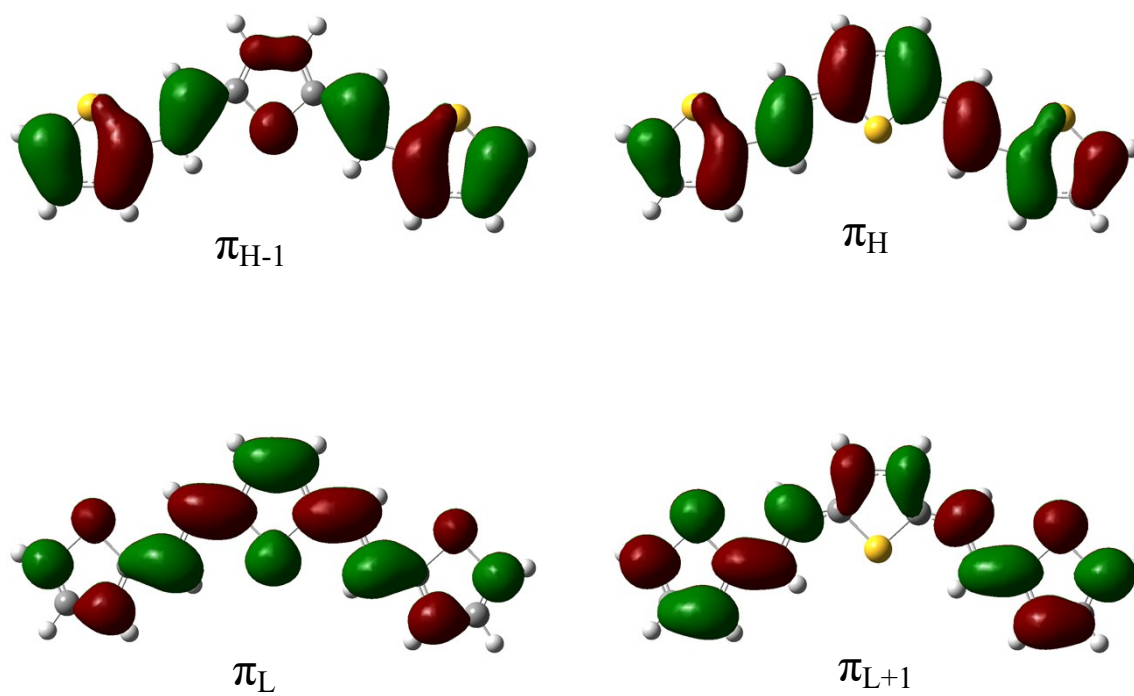

**Figure ESI.28.** Frontier molecular orbitals of **2,5-(2TE)<sub>2</sub>T**.

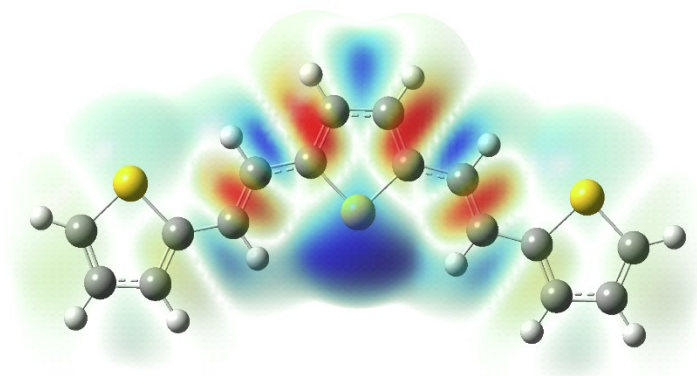

**Figure ESI.29.** Effect of the  $S_0 \rightarrow S_1$  transition on the electron density of **2,5-(2TE)<sub>2</sub>T**; increase and decrease of electron densities are represented by blue (+0.00008) and red (-0.00008), respectively.

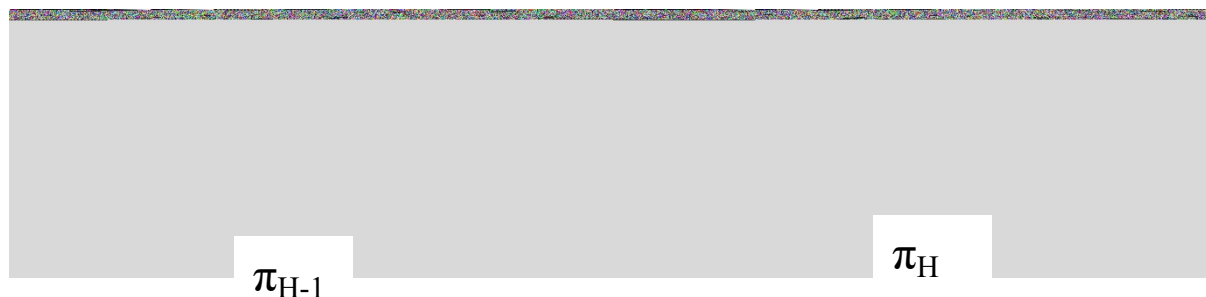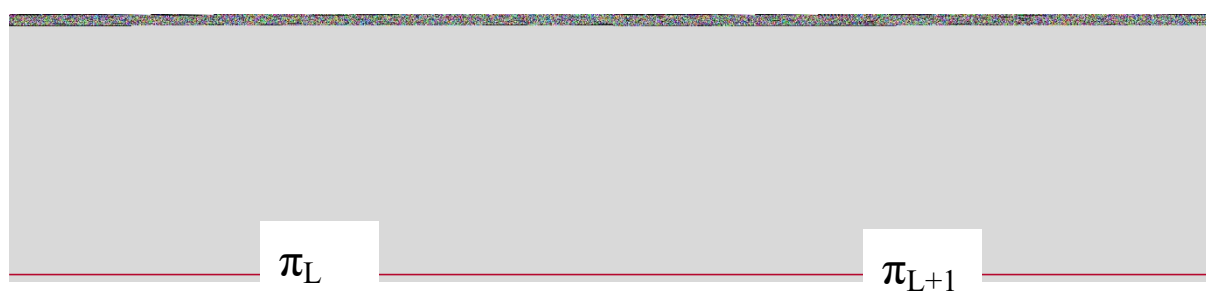

The quantum mechanical calculations on **DF** have already been reported in a previous paper.<sup>7</sup>

- 1 B. Carlotti, A. Cesaretti, G. Cacioppa, F. Elisei, I. Odak, I. Škorić and A. Spalletti, *Journal of Photochemistry and Photobiology A: Chemistry*, 2019, **368**, 190–199.
- 2 E. Marri, G. Galiazzo and A. Spalletti, *Photochem Photobiol Sci*, 2004, **3**, 205–210.
- 3 G. Bartocci, A. Spalletti, R. S. Becker, F. Elisei, S. Floridi and U. Mazzucato, *J. Am. Chem. Soc.*, 1999, **121**, 1065–1075.
- 4 E. Marri, G. Galiazzo, F. Masetti, U. Mazzucato, C. Zuccaccia and A. Spalletti, *Journal of Photochemistry and Photobiology A: Chemistry*, 2005, **174**, 181–186.
- 5 M. Montalti, A. Credi, L. Prodi and M. T. Gandolfi, *Handbook of Photochemistry*, CRC Press, Boca Raton, 3rd edn., 2006.
- 6 I. Carmichael and G. L. Hug, *Journal of Physical and Chemical Reference Data*, 1986, **15**, 1–250.
- 7 L. Mencaroni, B. Carlotti, A. Cesaretti, F. Elisei, A. Grgičević, I. Škorić and A. Spalletti, *Photochem. Photobiol. Sci.*, 2020, **19**, 1665–1676.
- 8 G. Ginocchietti, G. Galiazzo, U. Mazzucato and A. Spalletti, *Photochem Photobiol Sci*, 2005, **4**, 547–553.
- 9 X. Allonas, C. Ley, C. Bibaut, P. Jacques and J. P. Fouassier, *Chemical Physics Letters*, 2000, **322**, 483–490.
- 10 A. Samanta, B. Ramachandram and G. Saroja, *Journal of Photochemistry and Photobiology A: Chemistry*, 1996, **101**, 29–32.
- 11 L. Mencaroni, B. Carlotti, F. Elisei, A. Marrocchi and A. Spalletti, *Chem. Sci.*, 2022, **13**, 2071–2078.
- 12 B. Carlotti, M. Poddar, F. Elisei, A. Spalletti and R. Misra, *J. Phys. Chem. C*, 2019, **123**, 24362–24374.
- 13 T. D. Giacco, B. Carlotti, S. De Solis, A. Barbafrina and F. Elisei, *Phys. Chem. Chem. Phys.*, 2010, **12**, 8062.
- 14 A. Mazzoli, A. Spalletti, B. Carlotti, C. Emiliani, C. G. Fortuna, L. Urbanelli, L. Tarpani and R. Germani, *J. Phys. Chem. B*, 2015, **119**, 1483–1495.

- 15 W. Dai, T. Bianconi, E. Ferraguzzi, X. Wu, Y. Lei, J. Shi, B. Tong, B. Carlotti, Z. Cai and Y. Dong, *ACS Materials Lett.*, 2021, 1767–1777.
- 16 M. J. Frisch, G. W. Trucks, H. B. Schlegel, G. E. Scuseria, M. A. Robb, J. R. Cheeseman, G. Scalmani, V. Barone, G. A. Petersson and H. Nakatsuji, .
- 17 S. Tortorella, M. M. Talamo, A. Cardone, M. Pastore and F. De Angelis, *J. Phys.: Condens. Matter*, 2016, **28**, 074005.
- 18 V. Barone and M. Cossi, *J. Phys. Chem. A*, 1998, **102**, 1995–2001.
- 19 B. Carlotti, F. Elisei, U. Mazzucato and A. Spalletti, *Phys. Chem. Chem. Phys.*, 2015, **17**, 14740–14749.
